# Supplementary material
Source: PubMed Central journal article supplement (PMC9974593)
Supplement: NIHMS1848947-supplement-1848947_Sup_Info.pdf [file NIHMS1848947-supplement-1848947_Sup_Info.pdf]

# 1 **Supplementary Information Table of Contents**

|   |                            |      |
|---|----------------------------|------|
| 2 | Table of Contents          | 1    |
| 3 | Supplementary Methods      | 2-7  |
| 4 | Supplementary Figures 1-24 | 8-37 |
| 5 | Supplementary Table 2      | 38   |
| 6 | Supplementary References   | 39   |

7

8

9

10

11

12

13

14

15

16

17

18

19

20

21 **Materials.** Dulbecco's Modified Eagle's Medium (DMEM), Poly(maleic anhydride-alt-1-  
22 octadecene) (PMAO, Mn=30,000-50,000), ethylenediamine, DMF, tert-butanol and trypsin-EDTA  
23 solution were purchased from Sigma-Aldrich (MO, USA). PEG<sub>2K</sub>-NHS was purchased from  
24 JenKem Technology (TX, USA). Dicyandiamide was purchased from TCI America (OR, USA).  
25 Fetal bovine serum (FBS) and penicillin-streptomycin solution were purchased from Invitrogen  
26 (NY, USA). Antibodies used for flow cytometry were purchased from established vendors such  
27 as BioLegend and BD Biosciences. Dicyandiamide was purchased from TCI America Company  
28 (PA, USA).

29  
30 **Bulk messenger RNA-seq analysis.** RNA-seq was performed by the Health Sciences  
31 Sequencing Core at Children's Hospital of Pittsburgh. BALB/c mice (n=3) bearing s.c. CT26  
32 tumors (~200 mm<sup>3</sup>) received i.v. injection of FuOXP NPs (10 mg FuOXP/kg) with empty NPs as  
33 a control once every five days for three times. Tumors were harvested at 24 h after the last  
34 treatment. RNA-seq libraries were sequenced as 75-base paired-end reads at a depth of ~73 to  
35 77 million reads per sample. Reads were mapped to the mouse genome (GRCm38) using STAR  
36 Aligner 2.6.1a<sup>1</sup>. Gene expression quantification and differential expression analysis between  
37 empty NPs and FuOXP NPs treatment were performed using Cuffdiff of Cufflinks 2.2.1<sup>2</sup>. Volcano  
38 plots were generated to show the overall differential expression, where the x axis indicates the  
39 log<sub>2</sub>(fold change) (log<sub>2</sub>FC) between FuOXP NPs and empty NPs and the y axis indicates the  
40 corresponding -log<sub>10</sub>(P value).

41  
42 **Synthesis of PMBOP:** Poly(maleic anhydride-alt-1-octadecene) (PMAO, Mn=30,000-50,000,  
43 compound **1**, 7 g, 20 mmol of repeating units) and dry and degassed DMSO (150 mL) were added  
44 into a 250 mL glass bottle equipped with magnetic bar and placed under an atmosphere of

45 nitrogen. A volume of 6.67 mL ethylenediamine (100 mmol) in 50 mL dry and degassed DMSO  
46 solution was then added to the solution. After stirring at 160 °C under nitrogen for 48 hours, the  
47 solution was cooled down to room temperature, to which 1 L of HCl solution (2 mol/L) was added.  
48 The precipitate was filtered and washed 3 times with water, and then dried under vacuum at 50  
49 °C to obtain **Poly(maleimideethylamine-alt-1-octadecene) polymer (PMO, compound 2)**. Then,  
50 392 mg of compound **2** (1 mmol of repeating units), 200 mg of PEG<sub>2K</sub>-NHS (0.1 mmol), 10 mL of  
51 dry DMSO and 1 mL TEA (triethylamine) were added into a 50 mL bottle equipped with magnetic  
52 bar. The solution was allowed to stir for 48 hours at room temperature. After the reaction, the  
53 solution was transferred to dialysis bag (MWCO 12,000-14,000) and dialyzed against water for  
54 24 hours. After dialysis, the solution was filtered by P5 filter paper and lyophilized to obtain PEG-  
55 conjugated PMAO polymer with a yield of about 10-20%. PEG-conjugated PMAO polymer (100  
56 mg) and dicyandiamide (840 mg, 10 mmol) were then dissolved in 10 mL of *tert*-BuOH and  
57 refluxed with stirring for 12 hours. After the reaction, the solution was transferred to a dialysis bag  
58 (MWCO 12,000-14,000) and dialyzed for 24 hours against water. After lyophilization, the  
59 **Poly(maleimideethylbiscarboximidamide-alt-1-octadecene)-Poly(maleimideethylpolyethylene-**  
60 **glycol-alt-1-octadecene) (PMBOP, compound 3)** was obtained with a yield of ~98%.

61

62 **Cryo-electron microscopy:** Samples were first checked with negative stain electron microscopy  
63 by applying 3 µL to a freshly glow-discharged continuous carbon on a copper grid and staining  
64 with a 1% uranyl acetate solution. Grids were inserted into a Thermofisher TF20 electron  
65 microscope (Thermofisher Scientific, MA, USA) equipped with a field emission gun and imaged  
66 on a TVIPS XF416 CMOS camera (TVIPS GmbH, Gauting, Germany) to visualize nanoparticle  
67 uniformity and concentration. Cryo-grids were prepared by pipetting 3µL of sample on a  
68 Protochips C-flat CF-2/1-3CU-T grid (Protochips, NC, USA) that had been glow discharged at 25  
69 mA for 30 s using an Emitech KX100 glow discharger. Grids were mounted in a Thermofisher

70 Vitrobot Mk 4 with relative humidity of 95%, blotted for 3 s with a force setting of 4, and plunged  
71 into a 40/60 mixture of liquid ethane/propane<sup>3</sup> that was cooled by a bath of liquid nitrogen. Grids  
72 were transferred onto a Gatan 910 three-grid cryoholder (Gatan, Inc., CA, USA) and into the TF20  
73 microscope maintaining a temperature no higher than -175 °C throughout. The microscope was  
74 operated at 200 kV and contrast was enhanced with a 100 µm objective aperture. Cryo-electron  
75 micrographs were collected at a nominal 62,000x magnification on the TVIPS XF416 CMOS  
76 camera with a post-column magnification of 1.3x corresponding to a calibrated pixel size of 1.8  
77 Ångstroms at the sample. Low dose methods were used to avoid electron beam damage and  
78 images were acquired with TVIPS *Emplified* software using movie mode for drift correction.  
79 Exposures included 10 frames at 0.15 s each for a total exposure of 1.5 s, and a total dose of  
80 approximately 10 electrons per square Ångstrom.

81

82 ***In vitro* drug release:** The release of FuOXP from FuOXP-loaded PMBOP-CP NPs with or  
83 without siRNA complexation was examined using a dialysis method. Briefly, 200 µL of FuOXP-  
84 loaded PMBOP-CP and FuOXP/siXkr8-coloaded PMBOP-CP NPs containing 200 µg of FuOXP  
85 and 2 mg of PMBOP were placed in a dialysis bag (MWCO 3.5 kDa) containing 5 mL 0.1 M PBS  
86 solution or mouse serum, respectively, and immersed into 40 mL of 0.1 M PBS solution containing  
87 0.5% (w/v) Tween 80. The experiment was performed in an incubation shaker at 37°C at 100  
88 RPM. At selected time intervals, 10 µL solution in the dialysis bag and 1 mL medium outside the  
89 dialysis bag were withdrawn while same amount of fresh dialysis solution was added for  
90 replenishment. The concentration of FuOXP was examined by HPLC.

91

92 **Microscopic study of tumor distribution of NPs.** For *in vivo* tumor biodistribution study, CT26  
93 tumor bearing mice (~300 mm<sup>3</sup>) were i.v. injected with Cy5.5-siRNA-loaded NPs. The mice were



94 sacrificed at 24 h post injection. Tumor frozen sections were prepared and fixed with acetone at  
95 4°C for 5 min. Cytoskeleton was stained with AF488-Phalloidin (0.33  $\mu$ M) (Cell Signaling  
96 Technology, MA, USA) at room temperature for 15 min and cell nuclei were stained with Hoechst  
97 33324 (1  $\mu$ g/mL) (ThermoFisher Scientific, MA, USA) at room temperature for 15 min. Tissue  
98 sections were then washed with cold DPBS three times before observation under a confocal laser  
99 scanning microscope (CLSM, FluoView 1000, Olympus, Japan).

100

101 ***In vitro* gene knockdown:** CT26-Luc cells, a CT26 subline stably expressing luciferase were  
102 seeded in 24-well plates in antibiotic-free DMEM/FBS. After 24 h, cells were washed with DPBS  
103 and incubated for 1 h in DMEM containing various endocytosis pathway inhibitors (**Suppl Table**  
104 **2**), respectively. Cells were then treated with luciferase-siRNA (siLuc)-loaded PMBOP-CP NPs at  
105 a dose of 100 nM siRNA. Cells were washed at 4 h post-transfection with DPBS to remove any  
106 extracellular siRNAs and replaced with DMEM/FBS. At 24 h post-transfection, cells were collected  
107 and subjected to luciferase assay.

108

109 ***In vivo* gene knockdown:** MC38-Luc cells were s.c. inoculated into the right lower abdomen of  
110 C57BL/6 mice. SiLuc or siCT-loaded PMBOP-CP NPs were injected into MC38-Luc tumor-  
111 bearing mice at a dose of 2 mg siRNA/kg. The efficiency of gene knockdown was measured three  
112 times by whole-body bioluminescence imaging on the next day following the 1<sup>st</sup>, 2<sup>nd</sup>, and 3<sup>rd</sup>  
113 injection on day 10, 15 and 20 post tumor inoculation, respectively. Mice were anesthetized for  
114 the first two imaging and euthanized for the final imaging.

115

116 In a separate experiment, gene knockdown in liver and tumor by PMBOP-CP NPs was compared  
117 to a LNPs (lipid nanoparticles) formulation (cholesterol, DLin-MC3-DMA, DSPC, and PEG<sub>2000</sub>-

118 DMG in a 38.5: 50: 10: 1.5 ratio, m/m) used for Onpattro<sup>4</sup>. LNPs co-loaded with siLuc and Factor  
119 VII siRNA (siFVII) (1: 1, w/w) were prepared by a microfluidics method using NanoAssemblr Ignite  
120 (Precision Nanosystems, BC, Canada)<sup>5</sup>. PMBOP-CP NPs co-loaded with the two siRNAs were  
121 also prepared. Groups of 3 BALB/c mice bearing CT26-Luc tumors (s.c., ~300 mm<sup>3</sup>) received tail  
122 vein injection of PMBOP-CP NPs or LNPs at a total siRNA dose of 2 mg/kg once every 3 days for  
123 3 times. Two days after the last injection, mice were sacrificed and blood samples were collected.  
124 The level of Factor VII activity in plasma was analyzed using a Biophen FVII assay kit (Aniara  
125 Corporation, OH, USA). Tumors were also collected, homogenized and the level of luciferase  
126 activity was analyzed using Pierce<sup>TM</sup> Firefly Luciferase Glow Assay Kit (ThermoFisher Scientific,  
127 MA, USA).

128

129 **CT26 subline with stable mXkr8 knockdown:** A set of 3 SMARTvector Mouse Xkr8 Lentiviral  
130 mCMV-TurboGFP shRNAs and a SMARTvector control Lentiviral mCMV-TurboGFP shRNA were  
131 purchased from Horizon Discovery Biosciences (Cambridge, UK). CT26 cells were transduced  
132 with each lentiviral particle and polybrene at an optimal condition and predetermined 10 MOI in  
133 6-well plates. Cells were incubated for 24 h before sorting with TurboGFP to harvest CT26<sup>SMART</sup>  
134 <sup>mXkr8<sup>-/-</sup></sup> and CT26<sup>SMART</sup>.

135

136 For characterization of cell proliferation in culture, CT26<sup>SMART mXkr8<sup>-/-</sup></sup>, CT26<sup>SMART</sup> and CT26<sup>WT</sup> cells  
137 were seeded in 48-well plates at a density of 2 x 10<sup>3</sup> cells/well, respectively and incubated at 37  
138 °C. Cell proliferation was examined by MTT assay at day 1, 2, 3, and 4, respectively.

139

140 To examine tumor growth *in vivo*, CT26<sup>SMART mXkr8<sup>-/-</sup></sup>, CT26<sup>SMART</sup> and CT26<sup>WT</sup> were s.c. inoculated  
141 into the right lower abdomen of BALB/c mice and the sizes of tumors were monitored every 2

142 days. Tumor volume was calculated by the following formula: tumor volume =  $0.5 \times \text{length} \times$   
143  $\text{width}^2$ .

144

145 For *in vitro* phagocytosis assay, CT26<sup>SMART mXkr8-/-</sup>, CT26<sup>SMART</sup> and CT26<sup>WT</sup> (target cells) were  
146 stained with 5  $\mu\text{M}$  CFSE (ThermoFisher Scientific, MA, USA) and seeded at  $2.5 \times 10^5$  cells/well in  
147 uncoated 24-well suspension tissue culture plates. Macrophages isolated from mouse peritoneal  
148 cavity were seeded in adherent 24-well plates. Target cells were treated with DMSO or FuOXP  
149 for 24 h and then added to macrophages (1: 1 ratio) for co-incubation. Cells were cocultured at  
150  $37^\circ\text{C}$  for 1 h, after which the cells were detached from the plates, washed, and stained with  
151 macrophage-specific anti-F4/80 antibody for flow analysis<sup>6</sup>.

152

153 **Toxicity:** Body weights of mice were followed once every 2 days throughout the *in vivo* therapy  
154 study. After completing the experiment, blood samples were collected and ALT and AST were  
155 measured by ALT/SGPT or AST/SGOT liqui-UV assay kit following manufacturer's protocols<sup>7</sup>.  
156 Tumors and major organs including heart, liver, spleen, lung, and kidney were excised and fixed  
157 in PBS containing 10% formaldehyde, followed by embedment in paraffin. The paraffin embedded  
158 samples were sectioned into slices at  $4\ \mu\text{m}$  using an HM 325 Rotary Microtome. The tissue slices  
159 were then subjected to H&E staining for histopathological examination under a Zeiss Axiostar  
160 plus Microscope (PA, USA).

161

162 In a separate experiment, naive mice ( $n = 3$ ) received tail vein injection of siRNA-loaded PMBOP-  
163 CP NPs or siRNA complexed with DOTAP liposomes (N/P: 10/1) at a siRNA dose of 1 mg/kg.  
164 Two h later, blood was collected from the eye socket and the serum cytokine levels (TNF- $\alpha$  and  
165 IL-6) were determined with mouse cytokine assay kits.

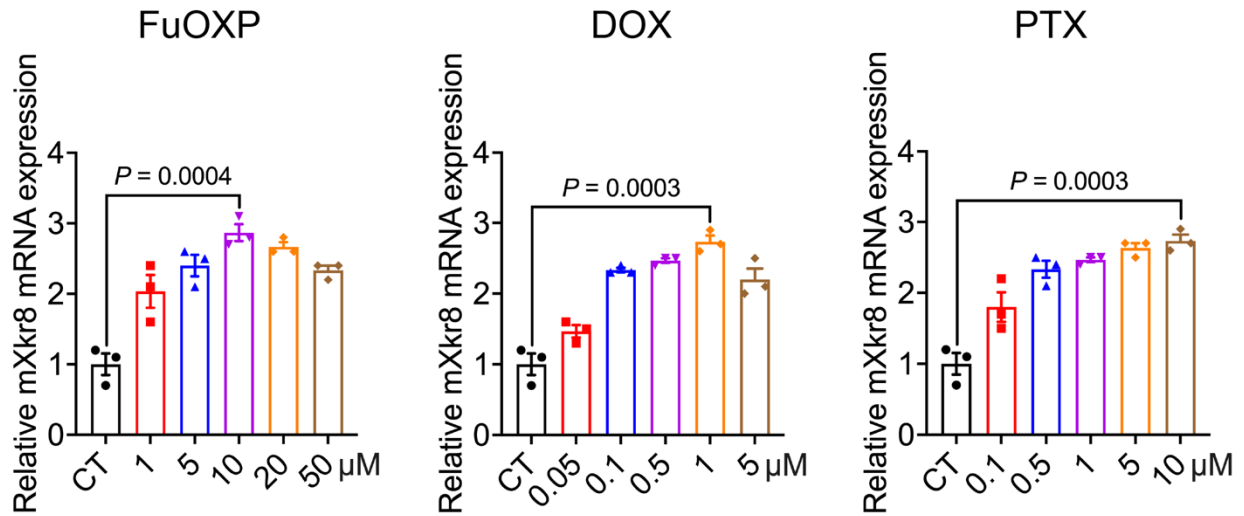

166

167

**Suppl Fig. 1. Xkr8 induction by different chemotherapy drugs.** CT26 tumor cells were

168

treated with various concentrations of FuOXP, DOX or PTX and the expression levels of

169

Xkr8 mRNA were examined 24 h later via qRT-PCR. Data are presented as mean ± SEM

170

(N= 3 replicates) and representative of 2 independent experiments. Statistical analysis

171

was performed by one-way analysis of variance (ANOVA) with Tukey post hoc test for

172

comparison.

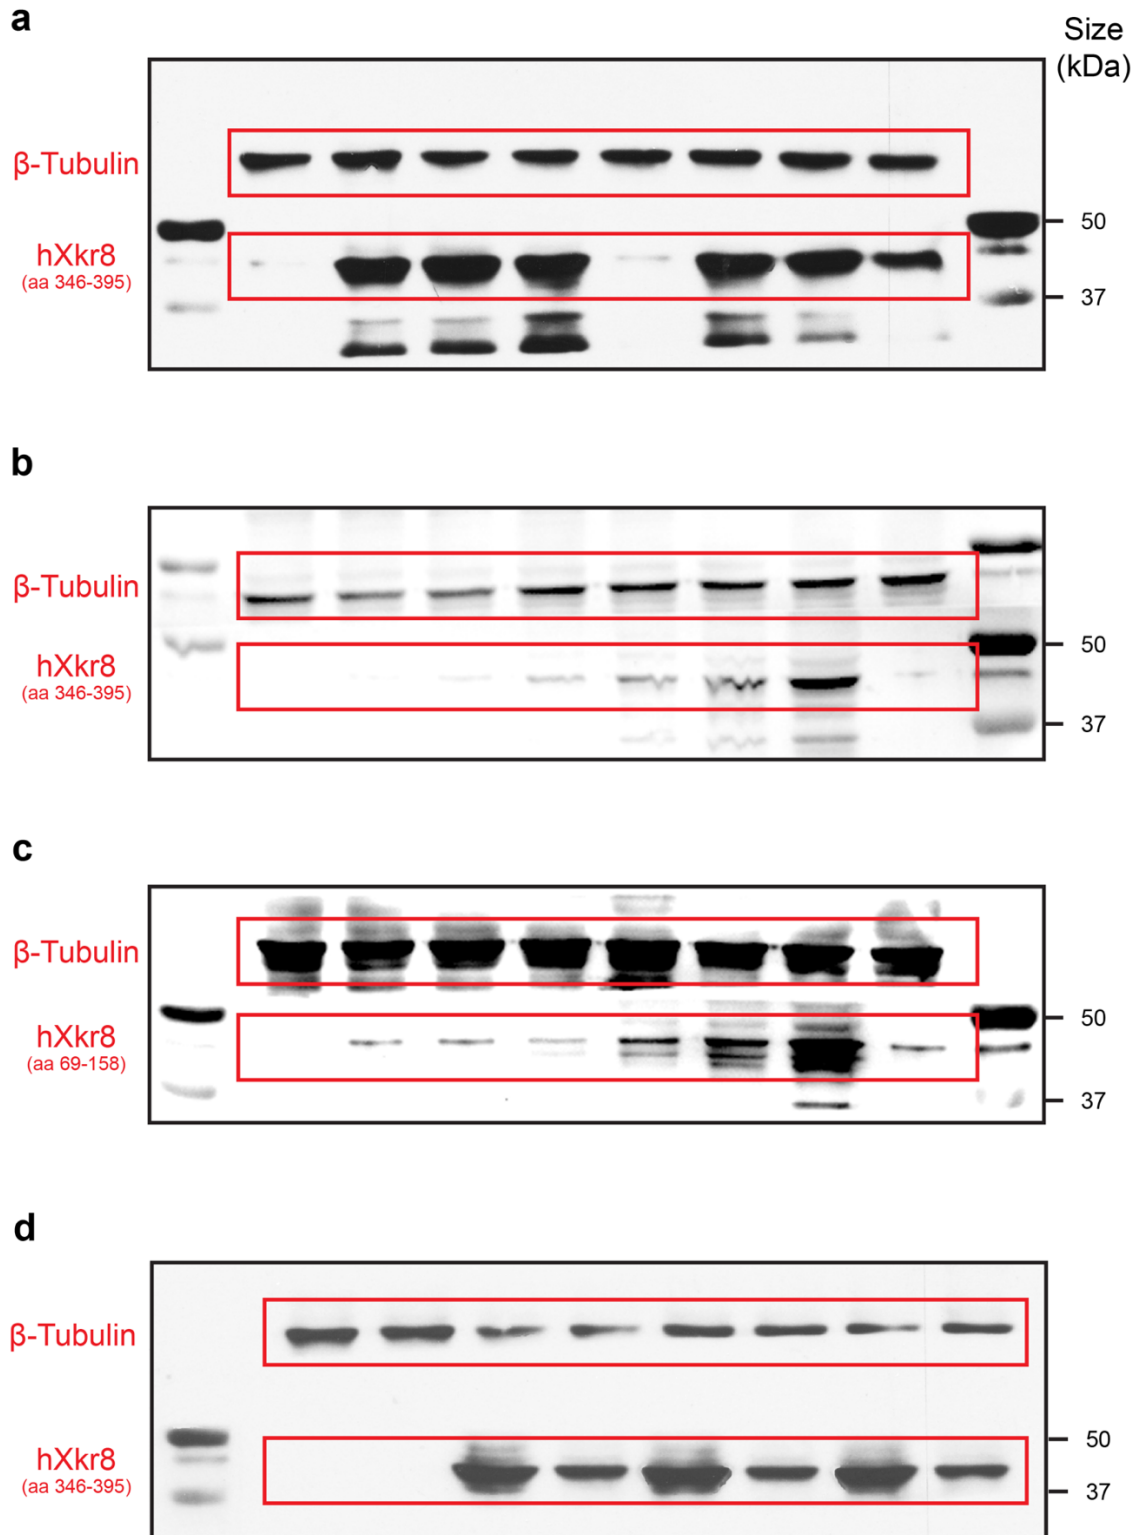

173

174 **Suppl Fig. 2. Representative Western blots with ladders for Fig. 1d (a), Fig. 1f (b),**

175 **Fig. 1h (c), and Fig. 1o (d).**

### Scheme 1

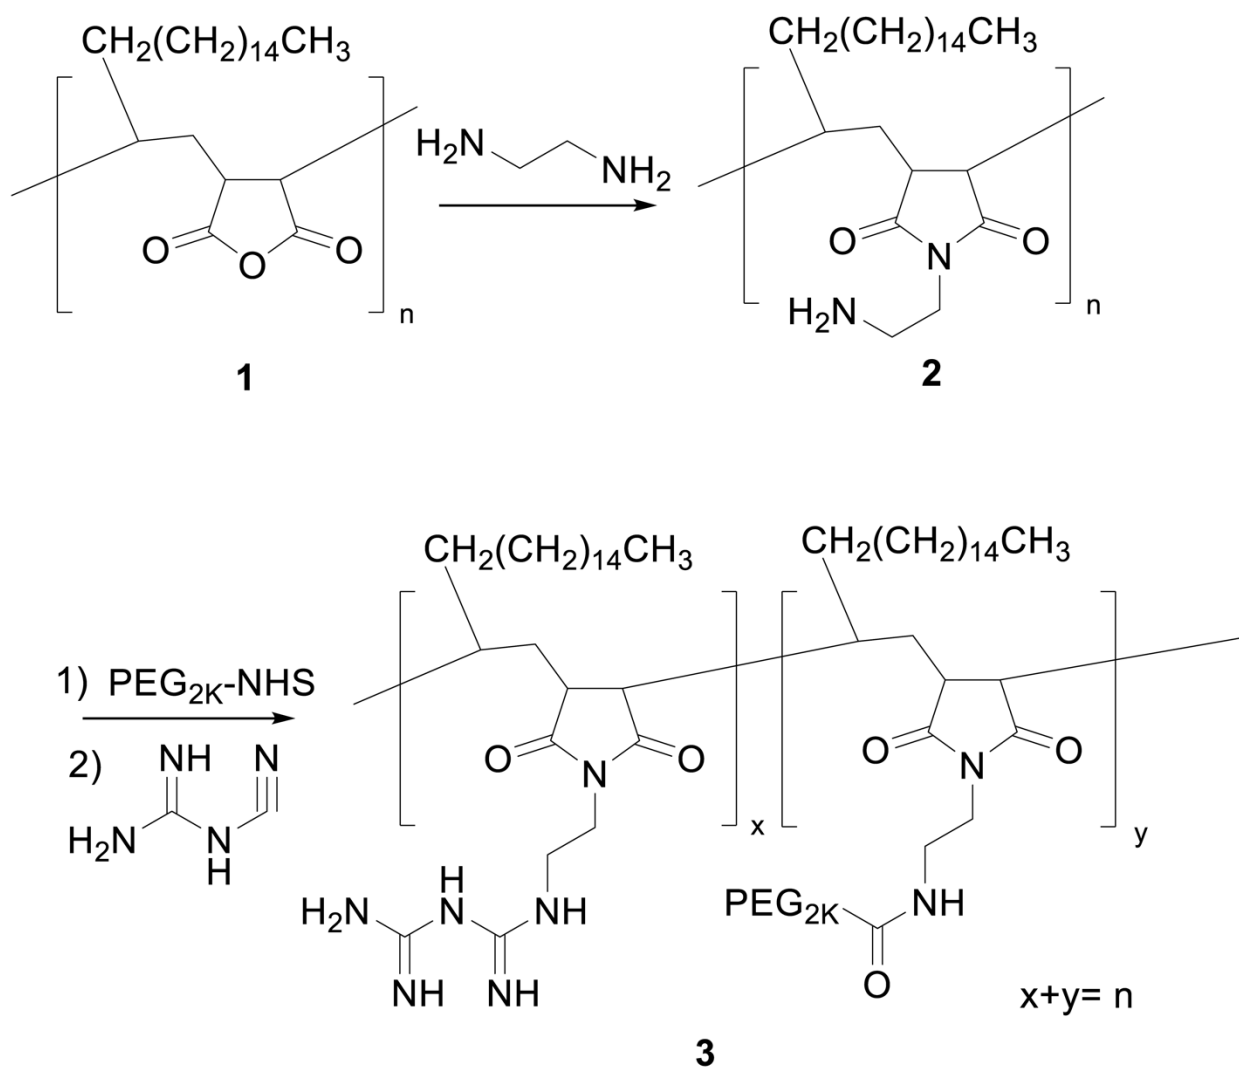

176

177 **Suppl Fig. 3. Synthesis scheme of PMBOP polymer.**

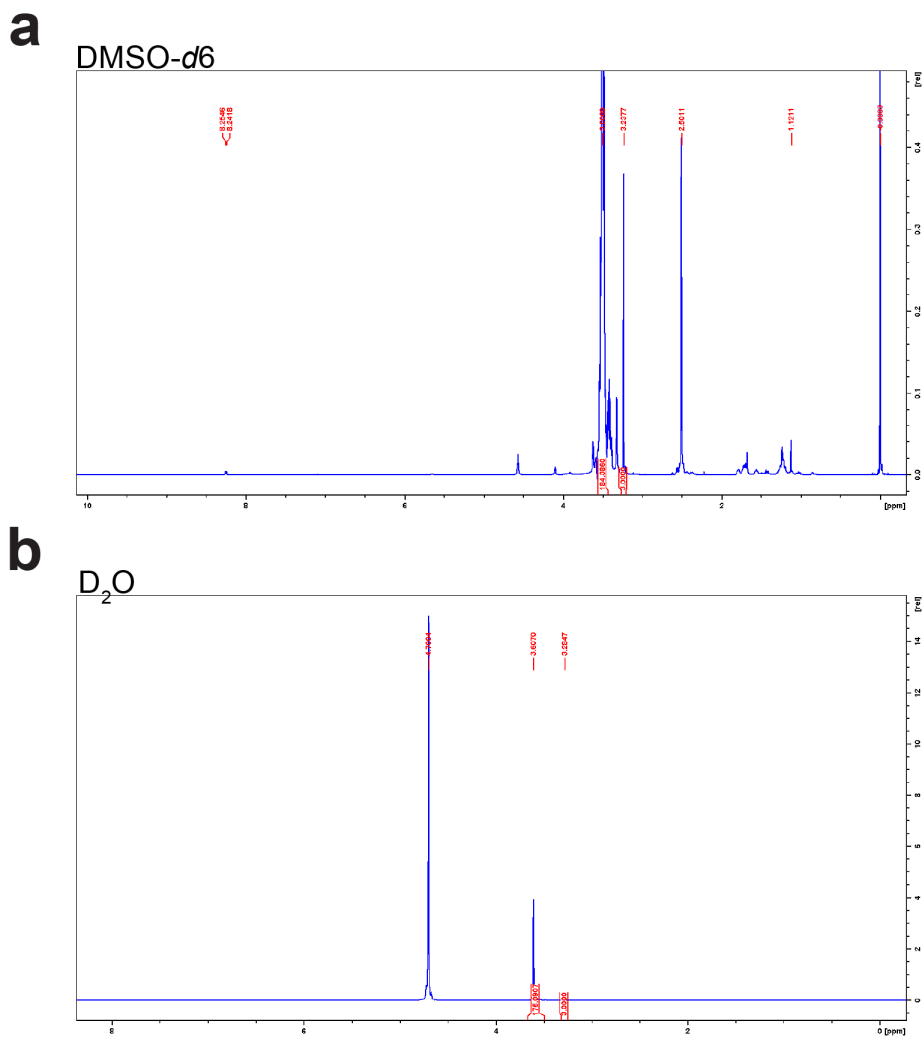

178

179 **Suppl Fig. 4. <sup>1</sup>H nuclear magnetic resonance (NMR) spectra of PMBOP polymer in**

180 **DMSO-*d*<sub>6</sub> (a), and in D<sub>2</sub>O (b).**

**a**

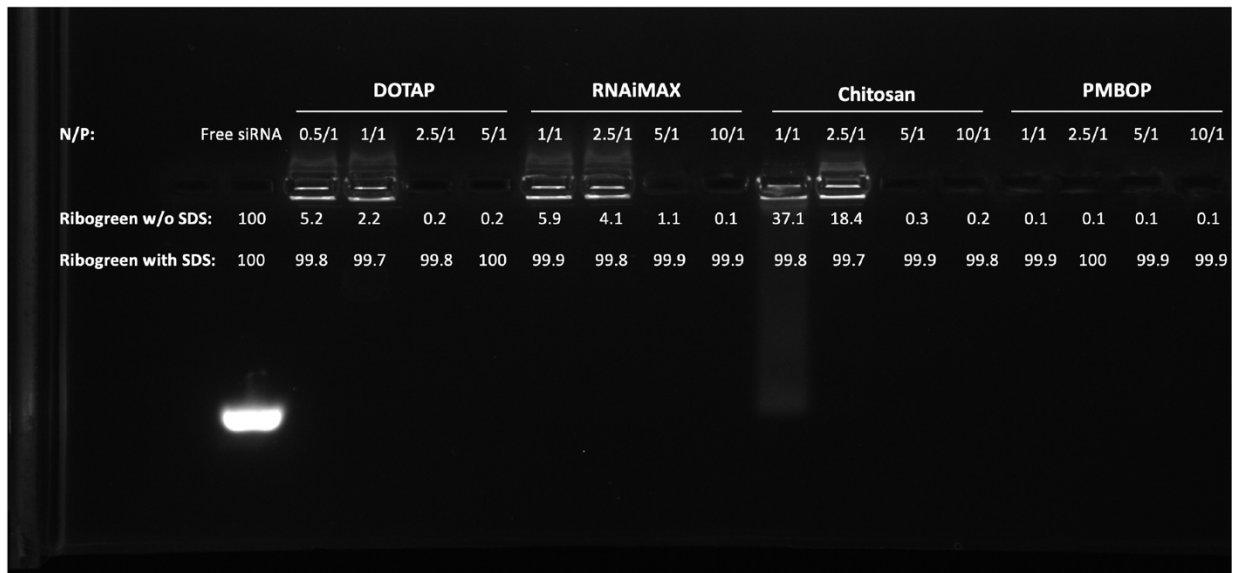

**b**

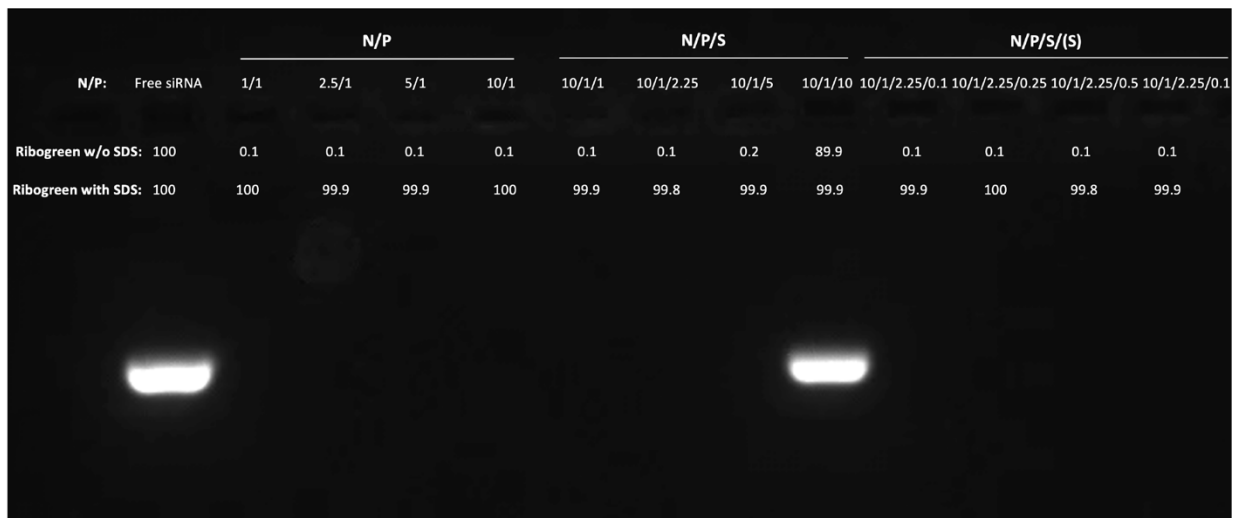

181

182 **Suppl Fig. 5. Gel retardation assay of various siRNA NPs.** a: Gel electrophoresis of

183 siRNA complexed with DOTAP liposome, Lipofectamine RNAiMAX, chitosan polymer or

184 PMBOP at various N/P ratios, showing formation of more compact complex for

185 PMBOP/siRNA. b: Gel electrophoresis of PMBOP/siRNA complexes at various N/P

186 ratios, and PMBOP/siRNA complexes (N/P, 10/1) coated with various amounts of CS and

187 PEG-CS. Shown are representative data from 2 independent experiments.



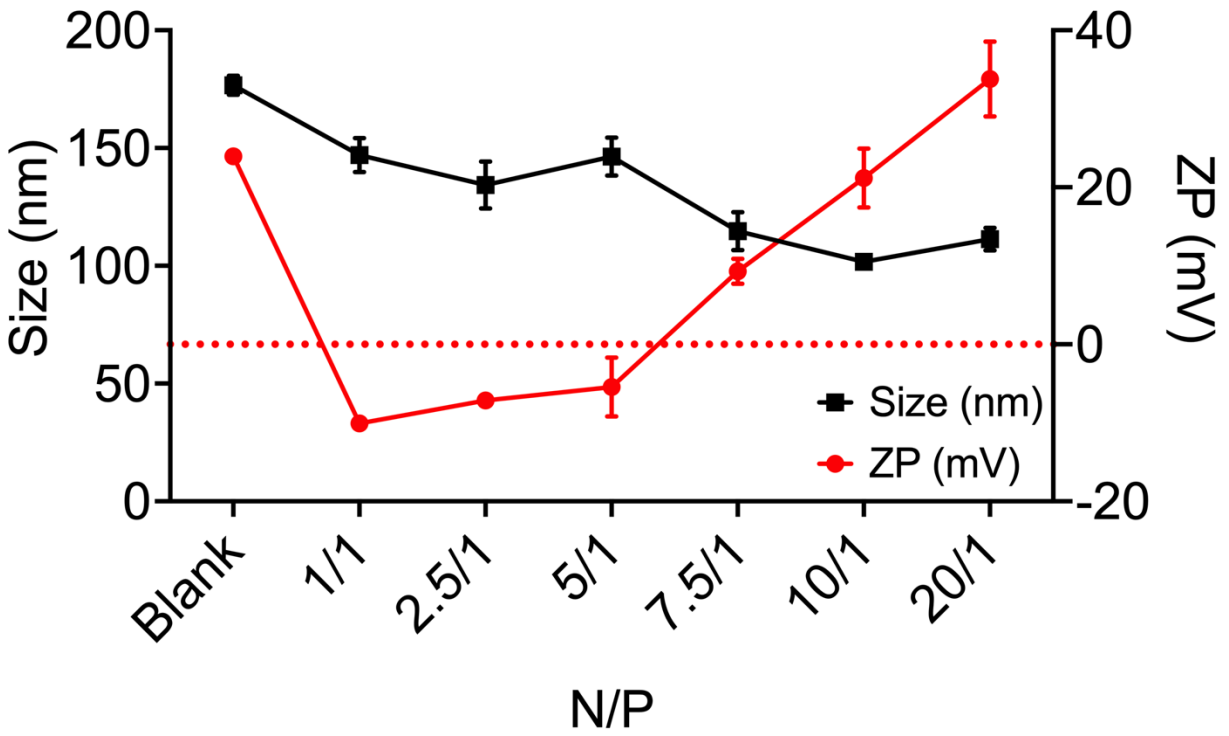

188

189 **Suppl Fig. 6. Sizes and zeta potentials of PMBOP/siRNA complexes at various N/P**  
 190 **ratios.** Data are presented as mean  $\pm$  SEM (N=3 replicates) and representative of 3  
 191 independent experiments

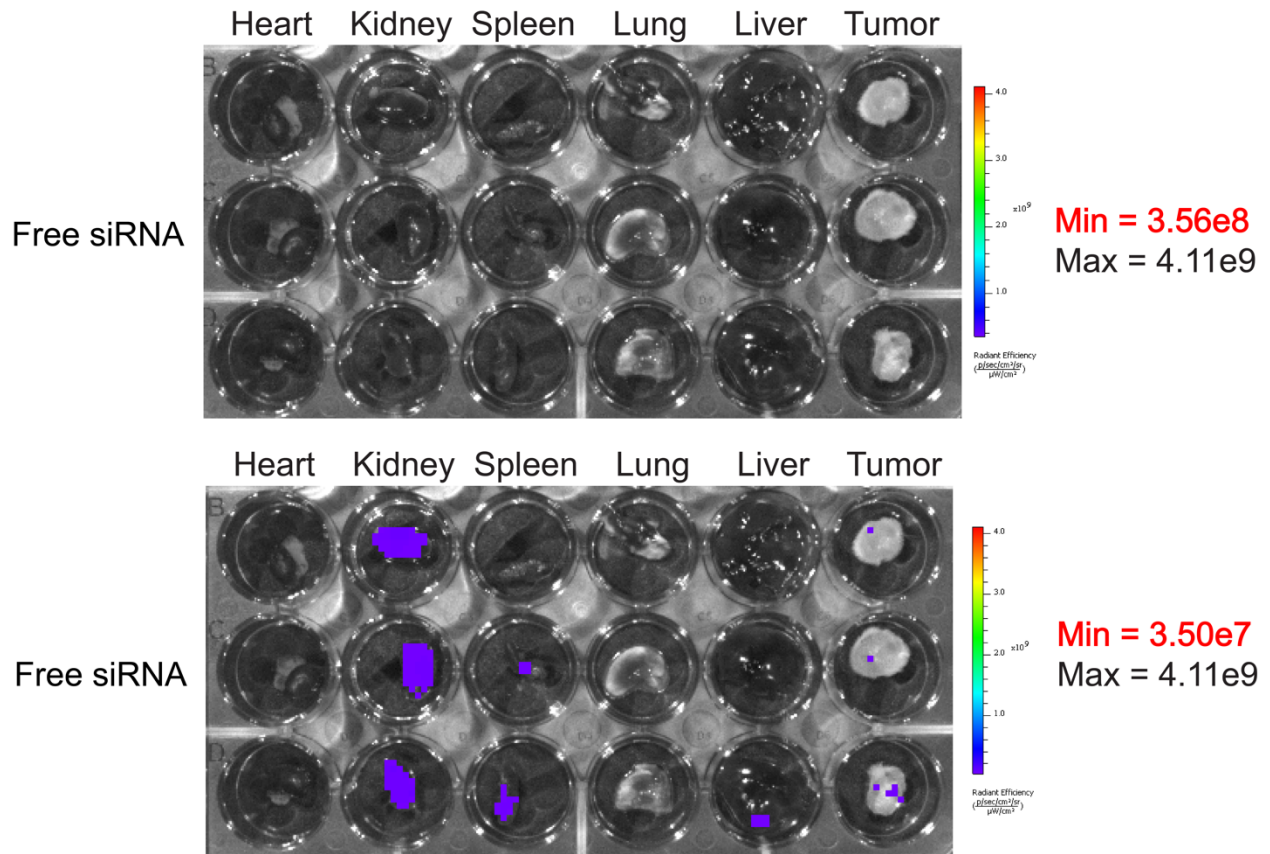

192

193 **Suppl Fig. 7. Ex vivo imaging of tumors (CT26) and major organs at 24 h following**

194 **i.v. administration of free Cy5.5-siRNA using two different color scales. Mice were**

195 **treated as detailed in Fig. 3b.**

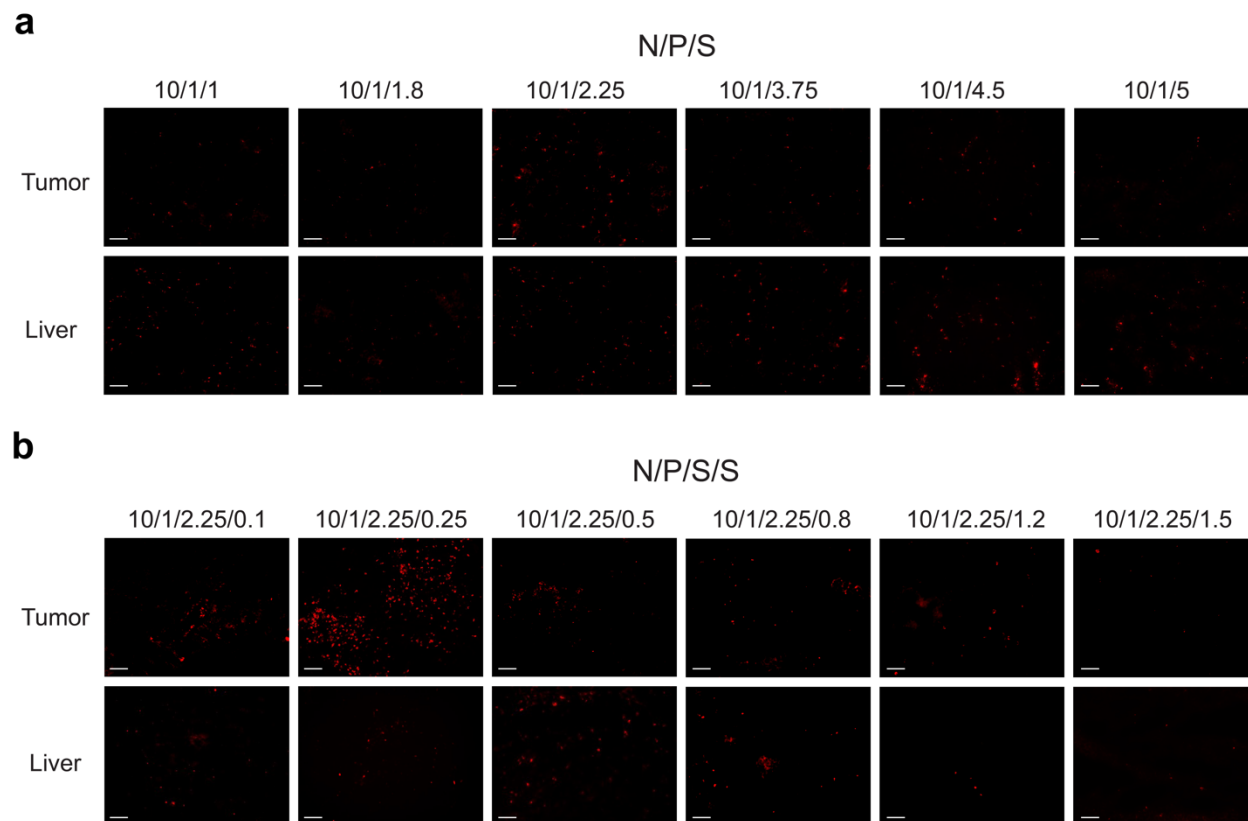

196

197 **Suppl Fig. 8. Characterizations of PMBOP NPs for *in vivo* delivery of siRNA to**  
 198 **tumors. a:** Cy5.5-siRNA-loaded PMBOP NPs with a N/P ratio of 10/1 were coated with  
 199 CS at an N/P/S (CS) ratio from 10/1/1 to 10/1/5, respectively. Tumor and liver sections  
 200 were prepared at 24 h following i.v. administration of the NPs and examined under a  
 201 fluorescence microscope. **b:** Cy5.5-siRNA-loaded PMBOP-C NPs with an N/P/S (CS)  
 202 ratio of 10/1/2.25 were further coated with PEG-CS with the CS/PEG-CS ratios ranging  
 203 from 2.25/0.1 to 2.25/1.5, respectively. The distribution of Cy5.5-siRNA in tumor and liver  
 204 sections was then similarly examined. Scale bar, 30  $\mu$ m. Shown are representative  
 205 images from 2 batches of tumor samples.

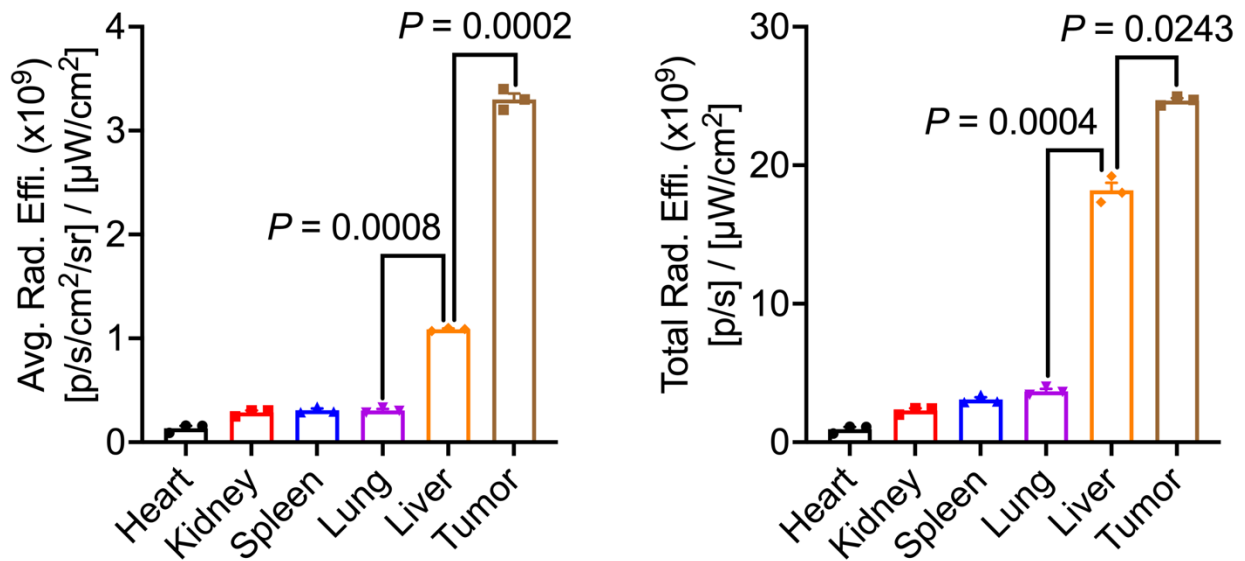

206

207 **Suppl Fig. 9. Quantification of average and total radiance efficiency of fluorescence**

208 **intensity (Cy5.5-siXkr8) in tumor and major organs in Fig. 3d. Data are presented as**

209 mean ± SEM (N= 3 mice per group) and representative of 2 independent experiments.

210 Statistical analysis was performed by one-way analysis of variance (ANOVA) with Tukey

211 post hoc test for comparison.

**a**

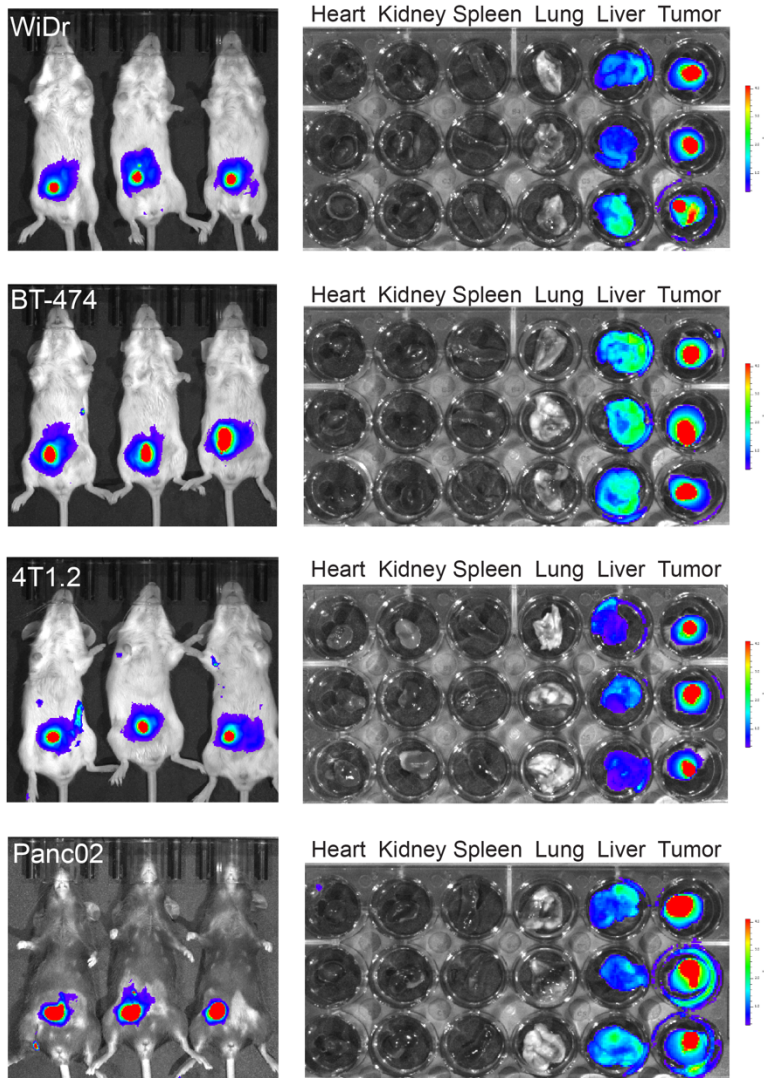

**b**

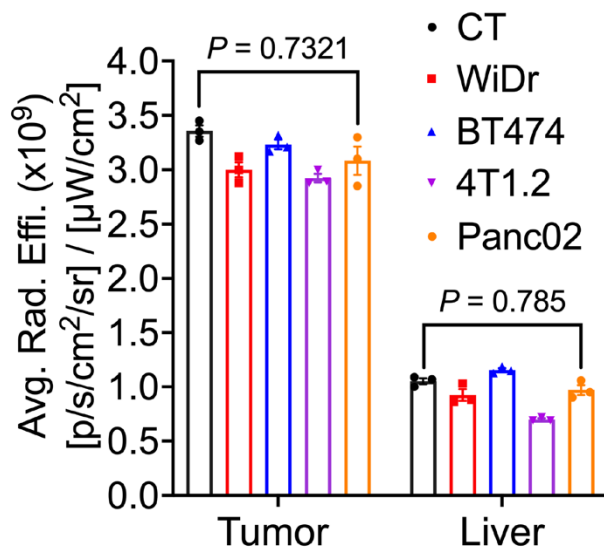

213 **Suppl Fig. 10. Comparison of *in vivo* tumor targeting efficiency of PMBOP-CP NPs**  
214 **among different tumor models. a:** NIRF whole body and *ex vivo* imaging of tumors and  
215 major organs of various tumor-bearing mice at 24 h following i.v. administration of Cy5.5-  
216 siRNA-loaded PMBOP-CP NPs. **b:** Fluorescence (Cy5.5-siRNA) intensity at tumors and  
217 livers of different tumor-bearing mice at 24 h following i.v. administration of Cy5.5-siRNA-  
218 loaded PMBOP-CP NPs. Data are presented as mean  $\pm$  SEM (N= 3 mice per group) and  
219 representative of 2 independent experiments. Statistical analysis was performed by one-  
220 way analysis of variance (ANOVA) with Tukey post hoc test for comparison.

221

222

223

224

225

226

227

228

229

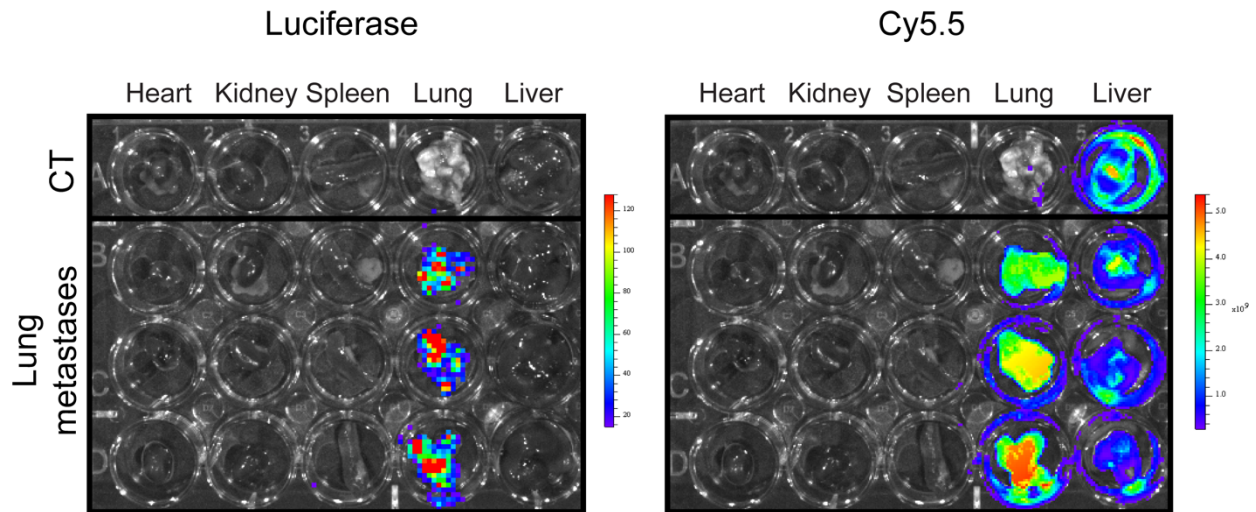

230

231 **Suppl Fig. 11. *Ex vivo* imaging of metastatic tumors in the lung, and other major**

232 **organs at 24 h following i.v. administration of Cy5.5-siRNA-loaded PMBOP-CP NPs.**

233 Lung metastatic tumor model was established via i.v. injection of CT26-luc cells ( $5 \times 10^5$

234 cells/mouse) and imaging was conducted at 18 days following tumor cell inoculation.

235 Shown are representative images from 2 independent experiments (N=3).

236

237

238

239

240

241

242

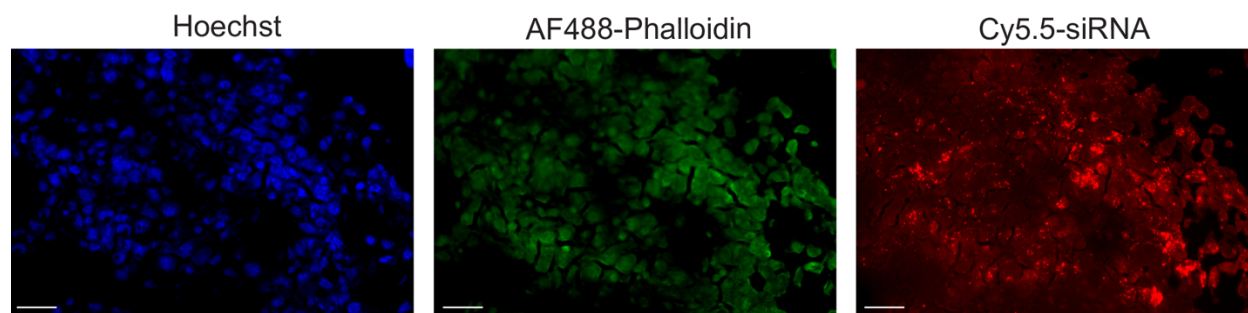

243

244 **Suppl Fig. 12. *In vivo* delivery of Cy5.5-siRNA to tumors via PMBOP-CP NPs.**

245 Confocal laser scanning microscope images of tumor (s.c. CT26) sections at 20x

246 magnification were taken at 24 h following i.v. administration of Cy5.5-siRNA-loaded

247 PMBOP-CP NPs. Cell nuclei were stained with Hoechst and cytoskeleton was stained by

248 AF488-Phalloidin. Scale bar, 30  $\mu$ m. Shown are representative images from 2 tumor

249 tissues.



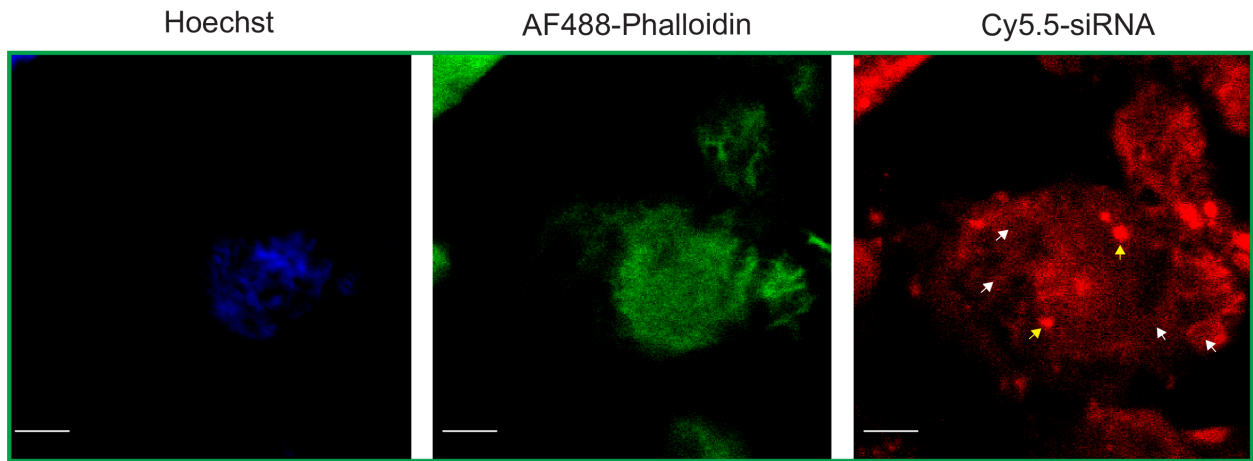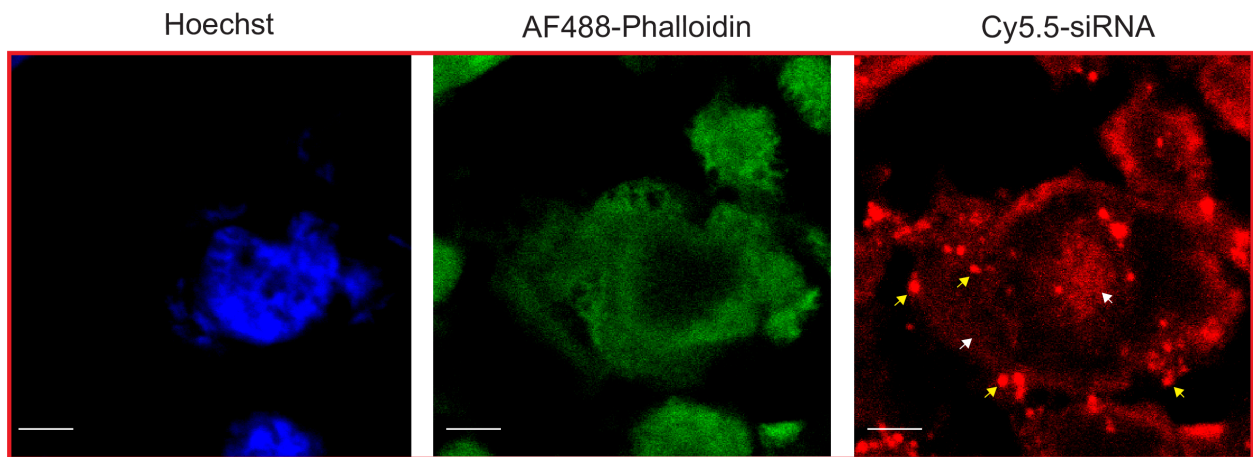

250

251 **Suppl Fig. 13. *In vivo* delivery of Cy5.5-siRNA to tumors via PMBOP-CP NPs.**

252 Confocal laser scanning microscope images of tumor (s.c. CT26) sections at 600x

253 magnification in different layers were taken at 24 h following i.v. administration of Cy5.5-

254 siRNA-loaded PMBOP-CP NPs. Cell nuclei were stained with Hoechst and cytoskeleton

255 was stained by AF488-Phalloidin. Upper panels: 0.1  $\mu\text{m}$  layer from the first scan; Lower

256 panels: 0.5  $\mu\text{m}$  layer from the first scan. Scale bar, 1  $\mu\text{m}$ . Shown are representative

257 images from 2 tumor tissues.

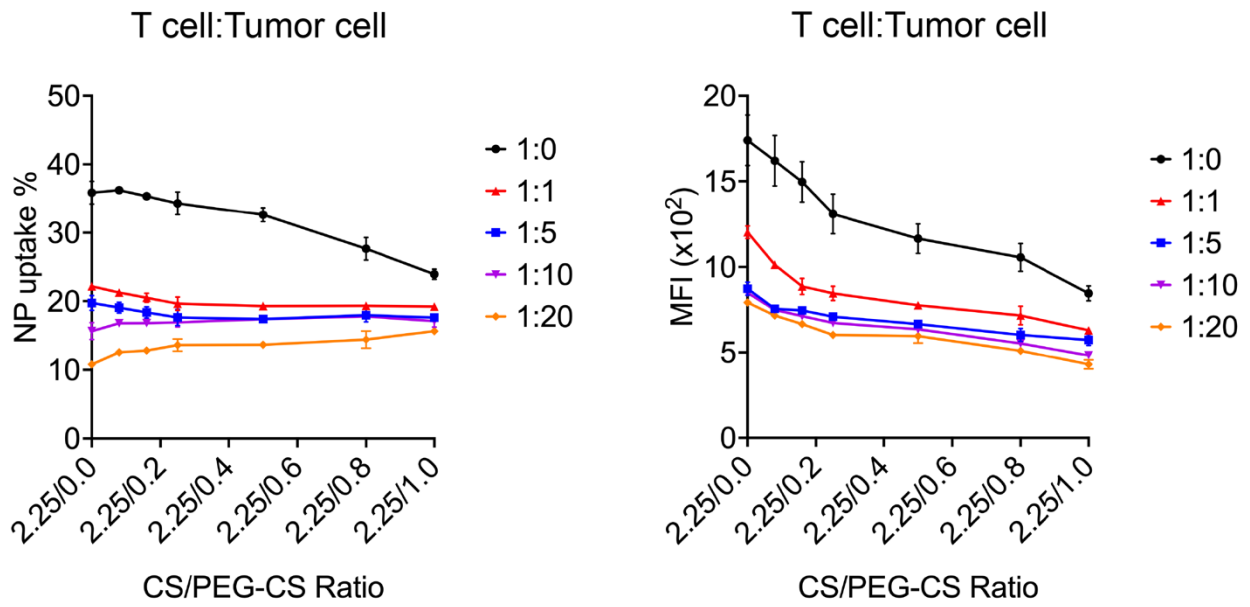

258

259 **Suppl Fig. 14. The uptake of NPs by T<sub>a</sub> in the presence of tumor cells at different**

260 **T<sub>a</sub>/tumor cell ratios.** T<sub>a</sub> and CT26 were mixed at different ratios and treated with Cy5.5-

261 siRNA-loaded PMBOP-CP NPs coated with various amounts of CS and PEG-CS. Four

262 (4) h later, cellular uptake of Cy5.5-siRNA was examined by flow. Results were expressed

263 as the percentage of Cy5.5<sup>+</sup> cells and mean fluorescence intensity (MFI) per cell,

264 respectively. Data are presented as mean ± SEM (N= 3 replicates) and representative of

265 2 independent experiments.

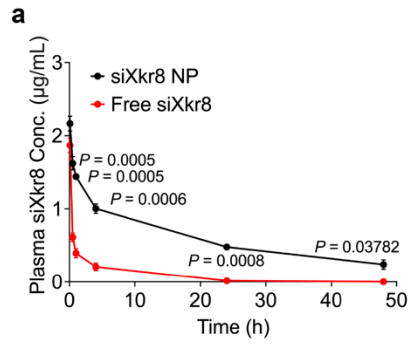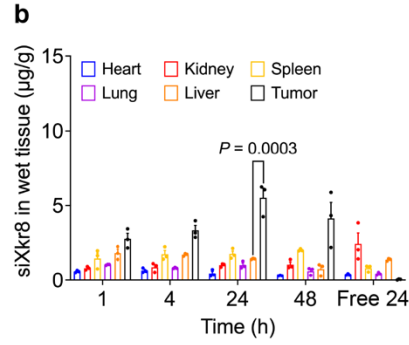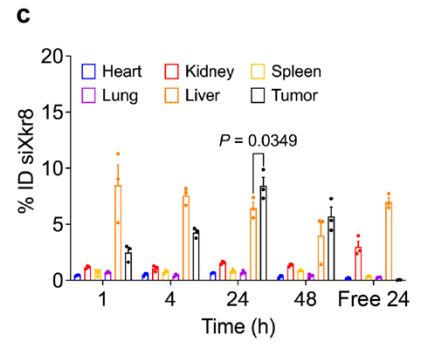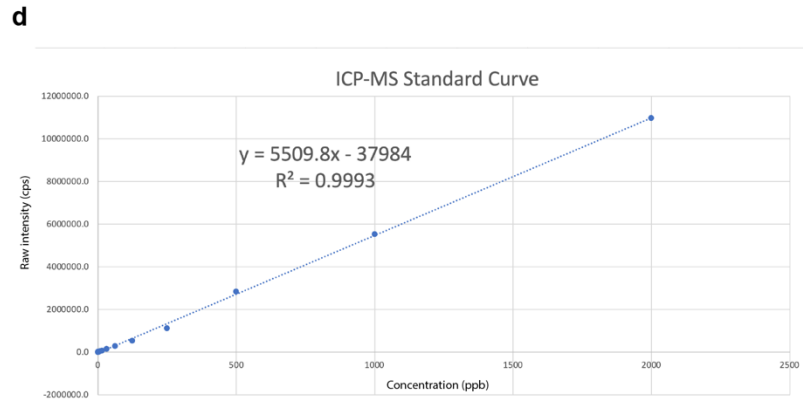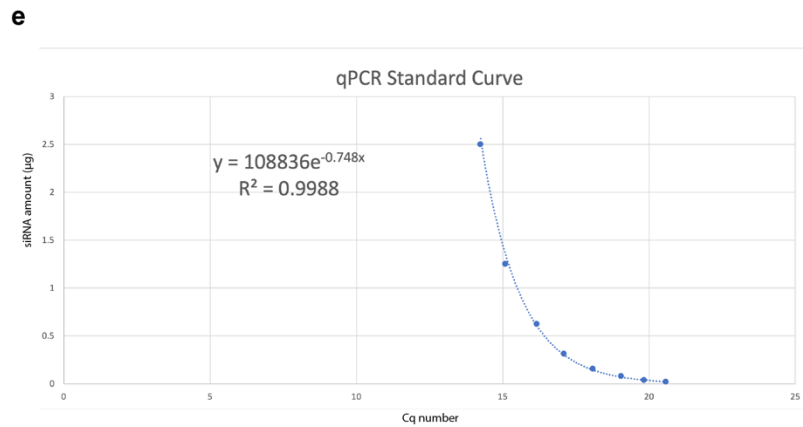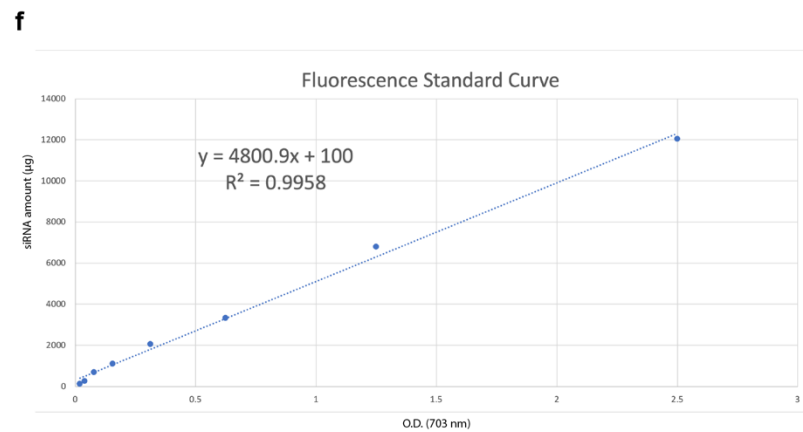

267 **Suppl Fig. 15. *In vivo* PK and tissue distribution of siXkr8 following i.v.**  
268 **administration of FuOXP/Cy5.5-siXkr8 NPs. a:** Fluorescence intensity of Cy5.5-siXkr8  
269 in plasma of BALB/c mice bearing CT26 tumors at different times following tail vein  
270 injection of free FuOXP/Cy5.5-siXkr8 (in Cremophor EL) and FuOXP/Cy5.5-siXkr8 NPs,  
271 respectively. The dose of FuOXP was 5 mg/kg and the siRNA dose was 1 mg/kg. Data  
272 are presented as mean  $\pm$  SEM (N= 3 mice per group) and representative of 2 independent  
273 experiments. **b & c:** Biodistribution of Cy5.5-siXkr8 in different organs of CT26 tumor-  
274 bearing BALB/c mice at different times following tail vein injection of free FuOXP/Cy5.5-  
275 siXkr8 and FuOXP/Cy5.5-siXkr8 NPs, respectively. Results were expressed as  
276 concentration of siXkr8 in wet tissue (**b**) and % of injected dose of siXkr8 (ID) (**c**),  
277 respectively. Data are presented as mean  $\pm$  SEM (N= 3 mice per group) and  
278 representative of 2 independent experiments. **d & e:** Standard curves and equations for  
279 ICP-MS analysis (**d**), qPCR (**e**), and fluorescence measurement (**f**). Statistical analysis  
280 was performed by two-tailed Student's *t*-test for comparison in **a** and one-way analysis of  
281 variance (ANOVA) with Tukey post hoc test for comparison in **b** and **c**. FuOXP is capable  
282 of forming complex with siRNA in Cremophor EL and protects siRNA, which is attributed  
283 to relatively higher amounts of siRNA in liver in comparison to minimal Cy5.5-siRNA  
284 signal in liver following i.v. injection of free Cy5.5-siRNA (**Suppl. Fig. 7**).

285

286

287

288

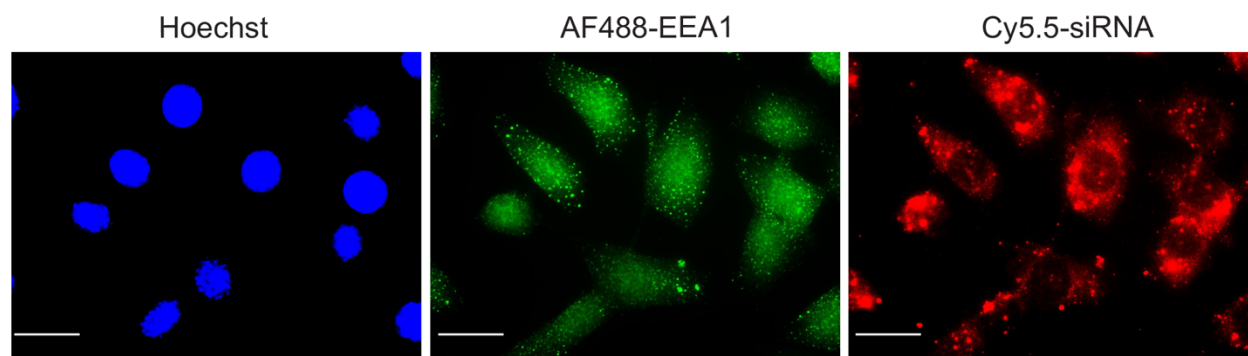

289

290 **Suppl Fig. 16. *In vitro* cellular uptake of Cy5.5 siRNA-loaded NPs.** Cultured CT26  
291 tumors cells were treated with Cy5.5 siRNA-loaded PMBOP-CP NPs and fluorescence  
292 microscopic images were taken 2 h later. Nucleus was stained with Hoechst and  
293 endosome was stained with AF488 EEA1 antibody. Scale bar, 10  $\mu$ m. Shown are the  
294 representative images from 3 independent experiments.

295

296

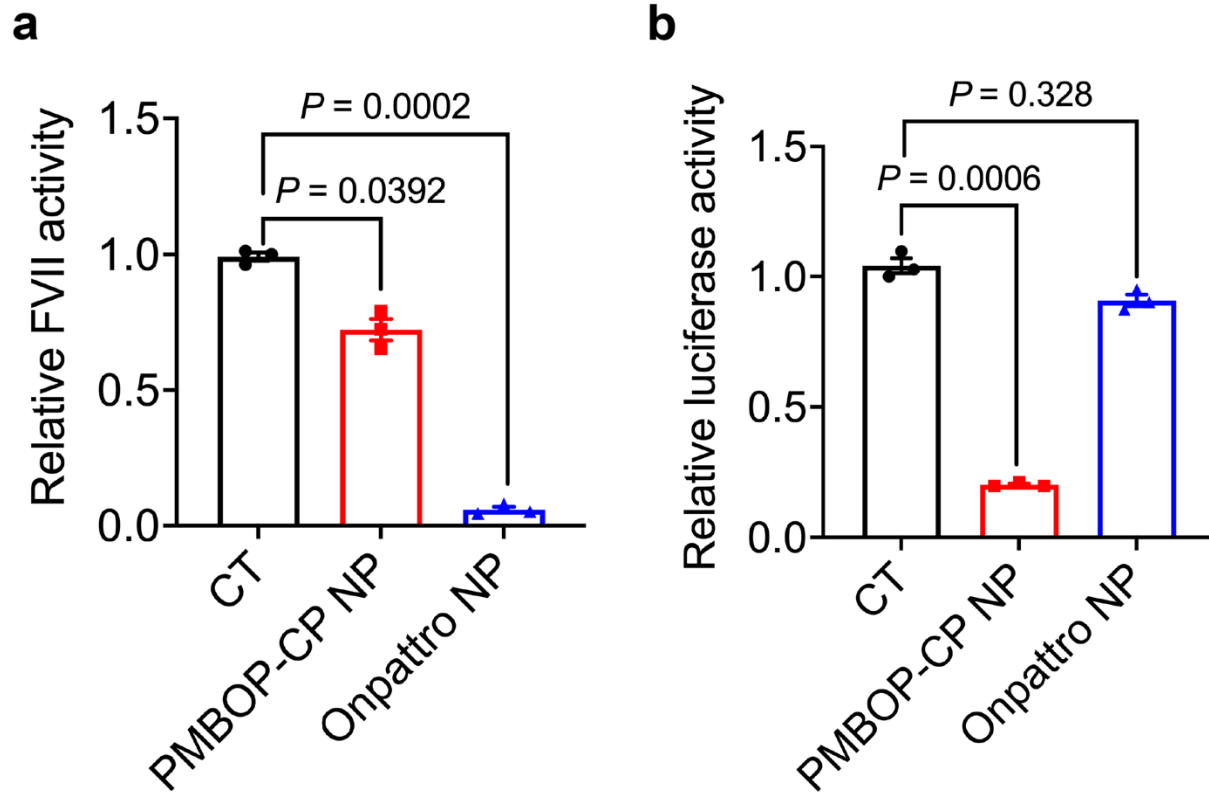

297

298 **Suppl Fig. 17. *In vivo* knockdown of FVII and luciferase.** Groups of 3 BALB/c mice

299 bearing CT26-luc tumors received tail vein injection of PMBOP-CP NPs or Onpattro NPs

300 co-loaded with siFVII and siLuc (1: 1, w/w) at a total siRNA dose of 2 mg/kg once every

301 3 days for 3 times. FVII activity in plasma (**a**) and luciferase activity in tumors (**b**) were

302 examined 2 days after the last injection. Data are presented as mean  $\pm$  SEM (N= 3 mice

303 per group). Statistical analysis was performed by one-way analysis of variance (ANOVA)

304 with Tukey post hoc test for comparison.

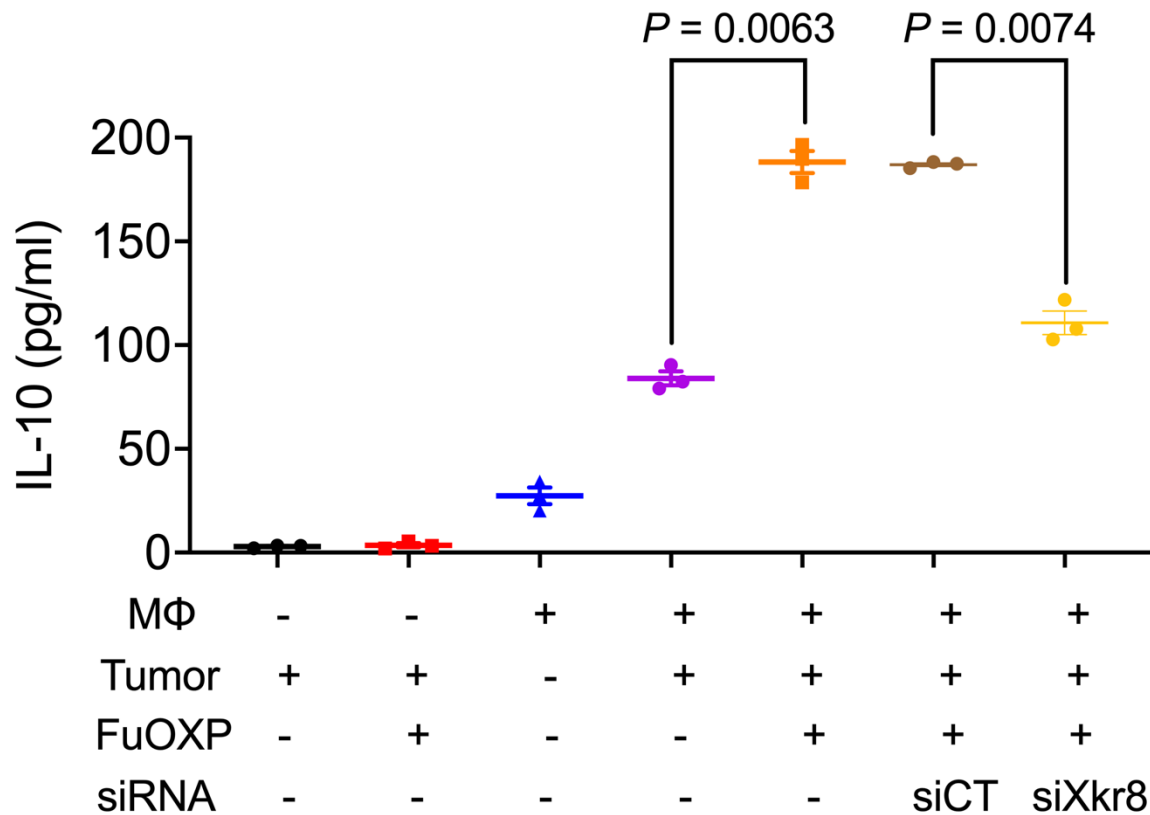

305

306 **Suppl Fig. 18. IL-10 production by macrophages.** CT26 tumor cells received various  
 307 treatments as described in **Fig. 6a** and tumor cells were then co-cultured with resident  
 308 peritoneal macrophages. Culture supernatants were collected after 24 h and IL-10 was  
 309 quantified by a mouse IL-10 ELISA kit. Data are presented as mean  $\pm$  SEM (N= 3).  
 310 Statistical analysis was performed by one-way analysis of variance (ANOVA) with Tukey  
 311 post hoc test for comparison.

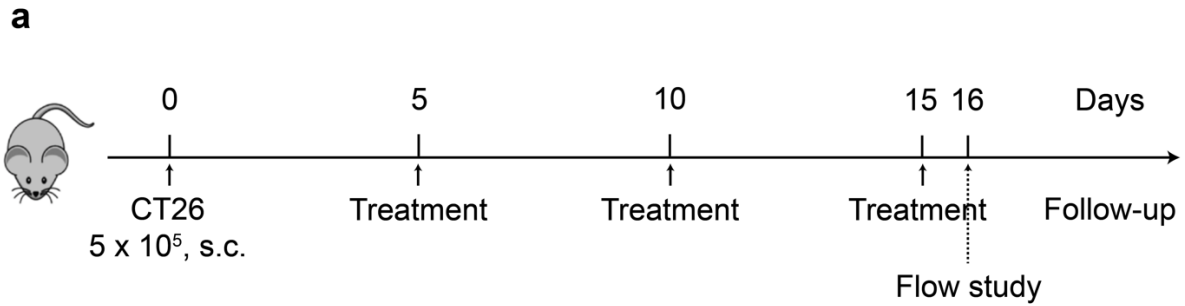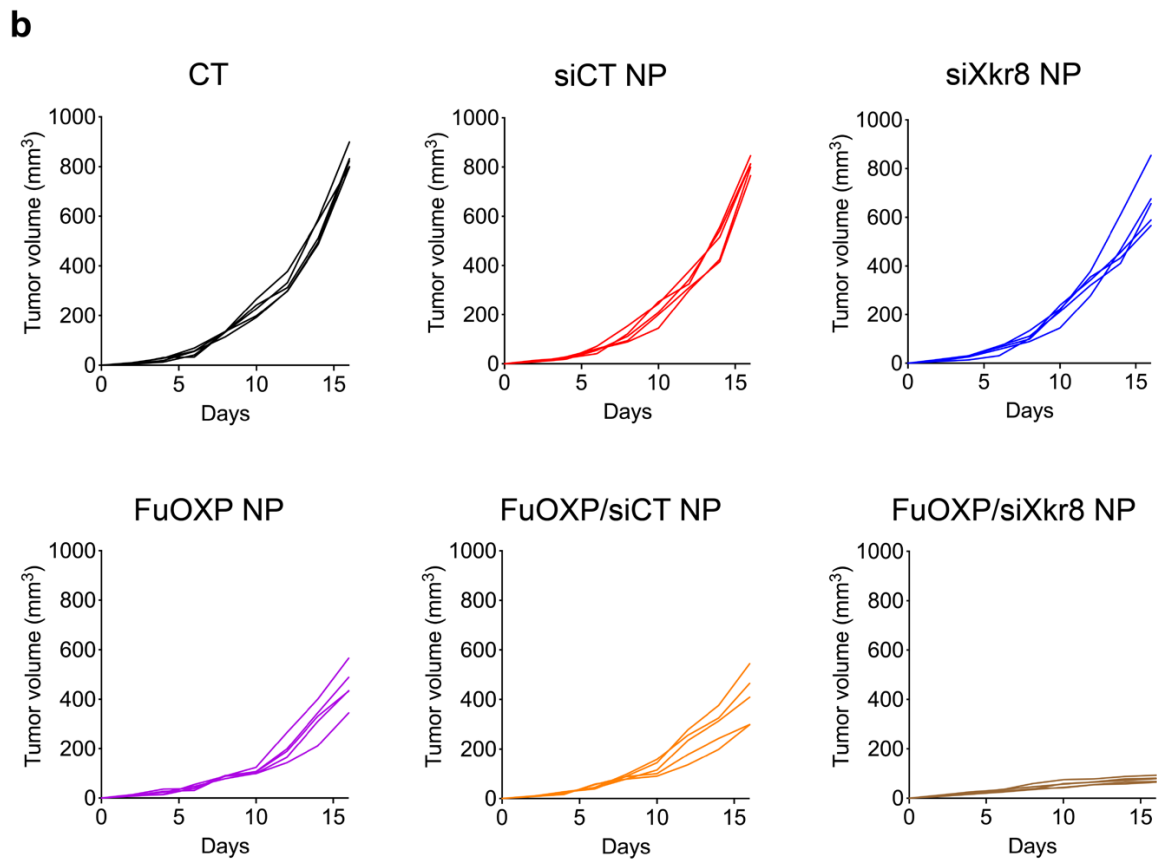

312

313 **Suppl Fig. 19. *In vivo* antitumor activity of FuOX/siXkr8 NPs in CT26 model.** Mice

314 bearing CT26 tumors received various treatments once every 5 days for 3 times at a

315 siRNA dose of 1 mg/kg and FuOX dose of 5 mg/kg. Tumor volumes were followed once

316 every 2 days. **a:** Treatment scheme; **b:** Individual tumor growth curves for mice bearing

317 CT26 tumors for **Fig. 6d**. Shown are representative data from 2 independent experiments

318 (n= 5).



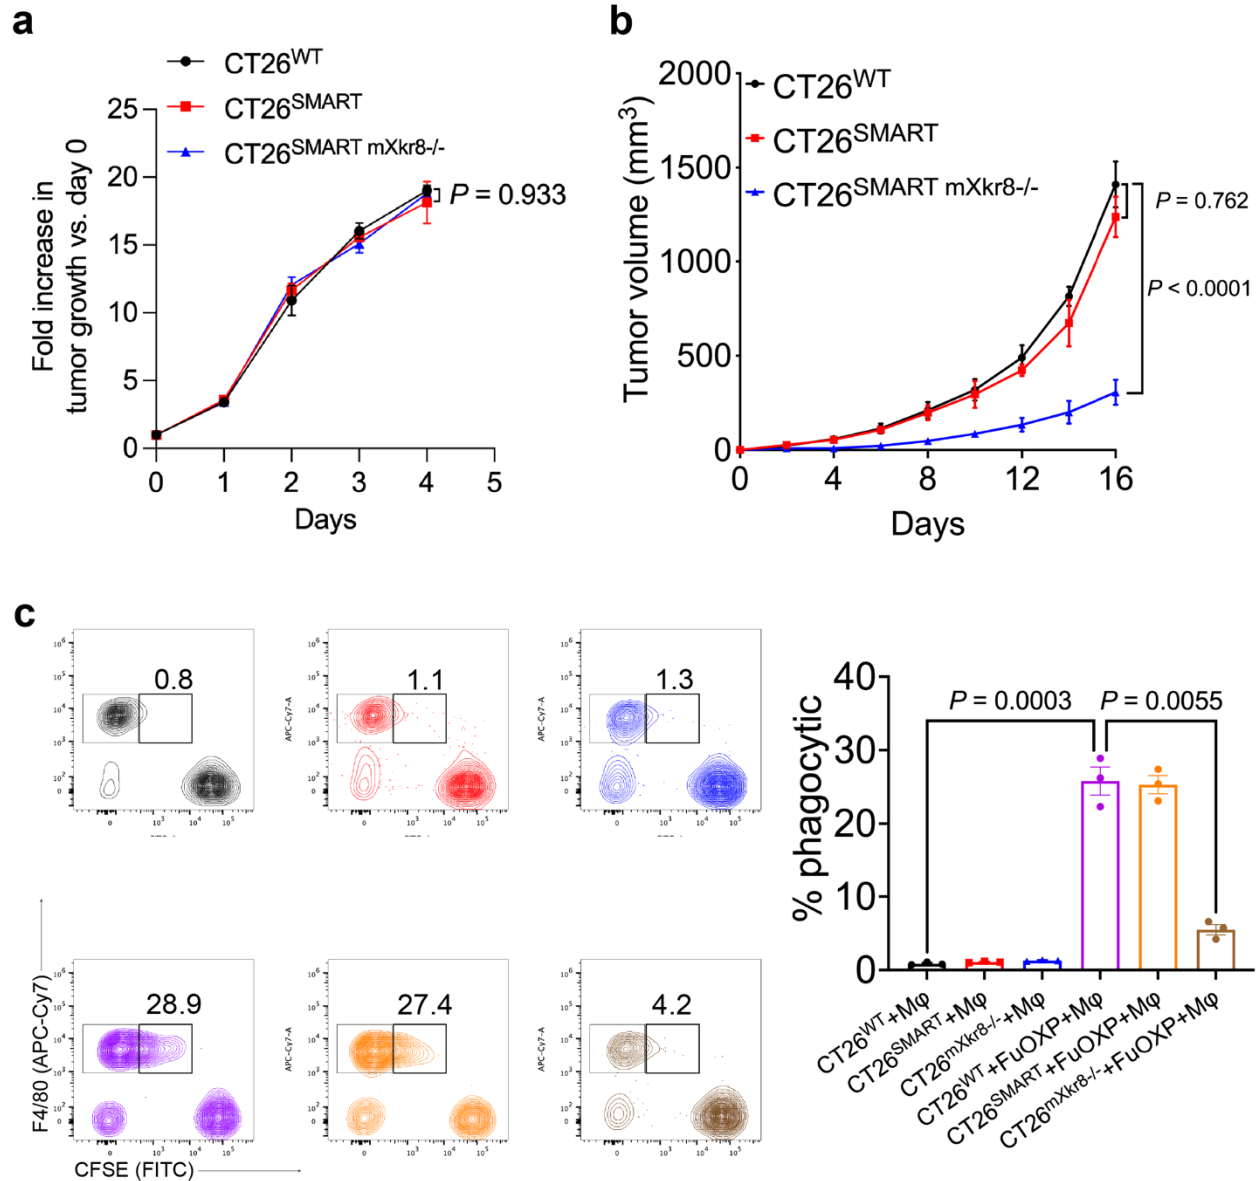

319

320 **Suppl Fig. 20. Characterizations of CT26 subline with stable mXkr8 knockdown. a:**

321 MTT assay of cell proliferation of CT26<sup>SMART mXkr8-/-</sup>, CT26<sup>SMART</sup> and CT26<sup>WT</sup> tumor cells

322 at different timepoints. Data are presented as mean  $\pm$  SEM (N= 6 replicates). **b:**

323 CT26<sup>SMART mXkr8-/-</sup>, CT26<sup>SMART</sup> and CT26<sup>WT</sup> tumor cells were s.c. inoculated into the right

324 lower abdomen of BALB/c mice and the sizes of tumors were monitored once every 2 d.

325 Data are presented as mean  $\pm$  SEM (N= 8). **c:** CT26<sup>SMART mXkr8-/-</sup>, CT26<sup>SMART</sup> and CT26<sup>WT</sup>

326 tumor cells labelled with CFSE (FITC) were treated with DMSO or FuOXP (10  $\mu$ M) for  
327 24h followed by co-culture with resident peritoneal macrophages (stained with anti-F4/80  
328 antibody). The numbers of CFSE<sup>+</sup> macrophages (APC-Cy7<sup>+</sup> & F4/80<sup>+</sup>) were examined by  
329 flow 1 h later. Data are presented as mean  $\pm$  SEM (N= 3 replicates) and representative  
330 of 2 independent experiments. Statistical analysis was performed by one-way analysis of  
331 variance (ANOVA) with Tukey post hoc test for comparison.

332

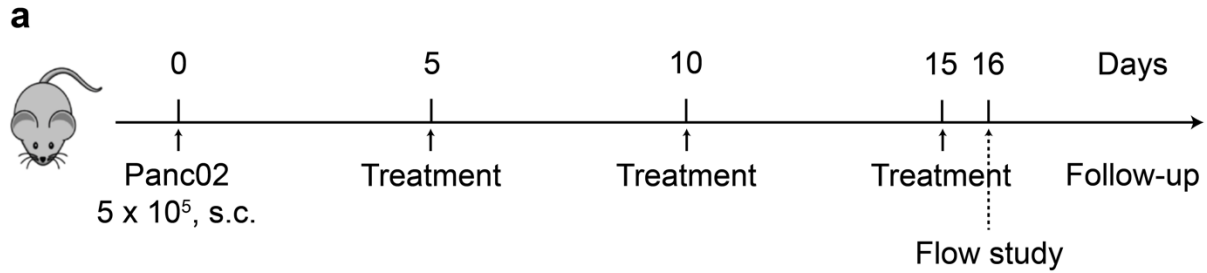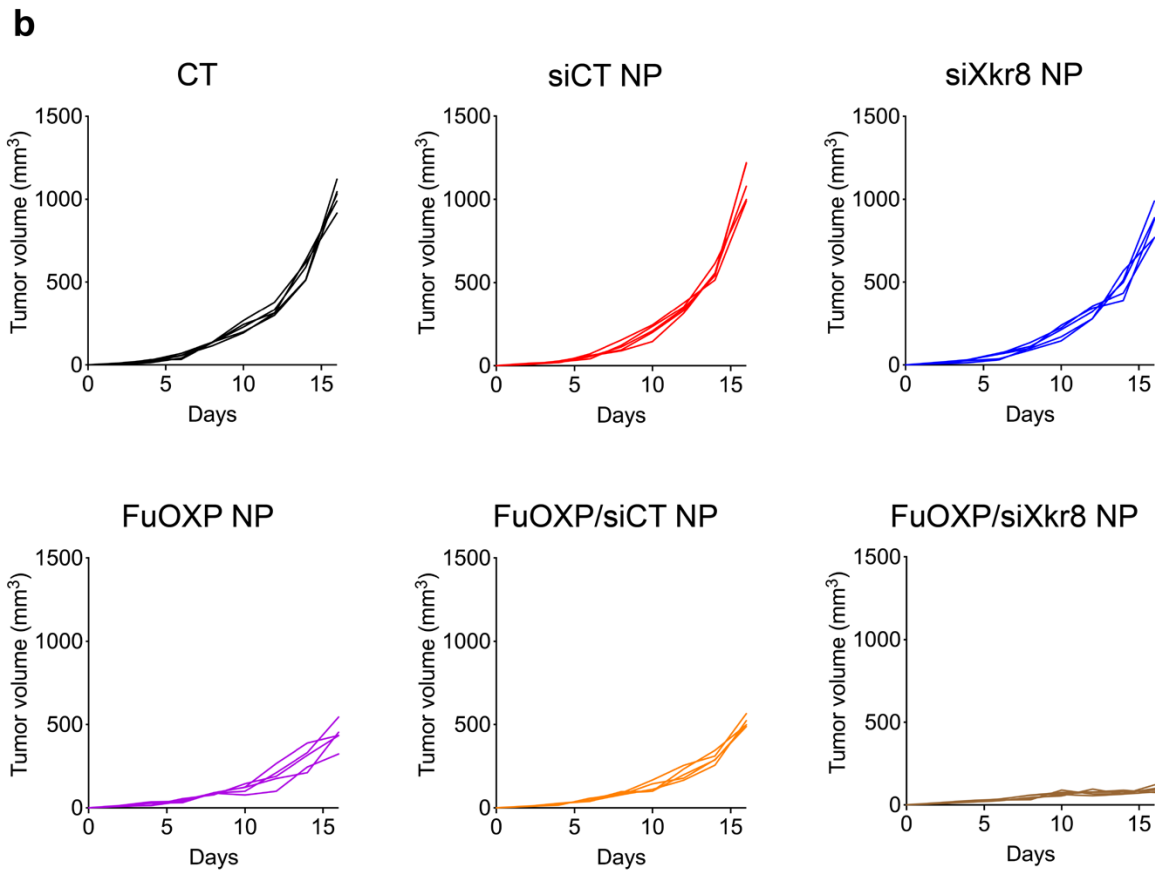

333

334 **Suppl Fig. 21. *In vivo* antitumor activity of FuOX/siXkr8 NPs in Panc02 model.** Mice

335 bearing Panc02 tumors received various treatments once every 5 days for 3 times at a

336 siRNA dose of 1 mg/kg and FuOX dose of 5 mg/kg. Tumor volumes were followed once

337 every 2 days. **a:** Treatment scheme; **b:** Individual tumor growth curves for mice bearing

338 Panc02 tumors for **Fig. 6e**. Shown are representative data of 2 independent experiments

339 (n= 5).

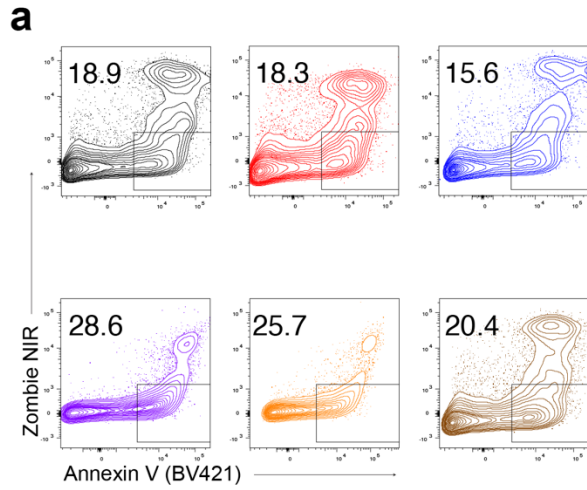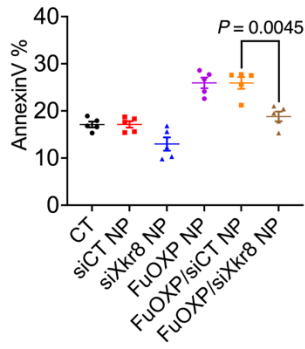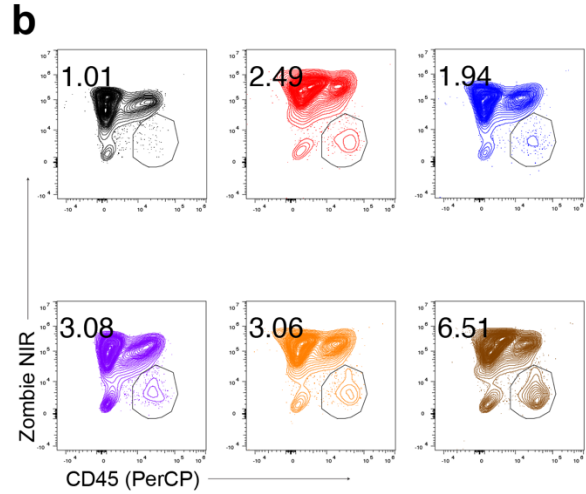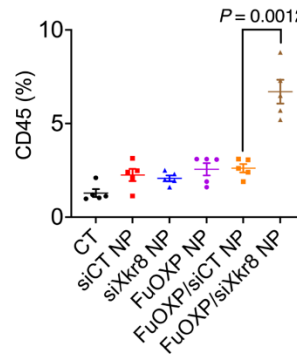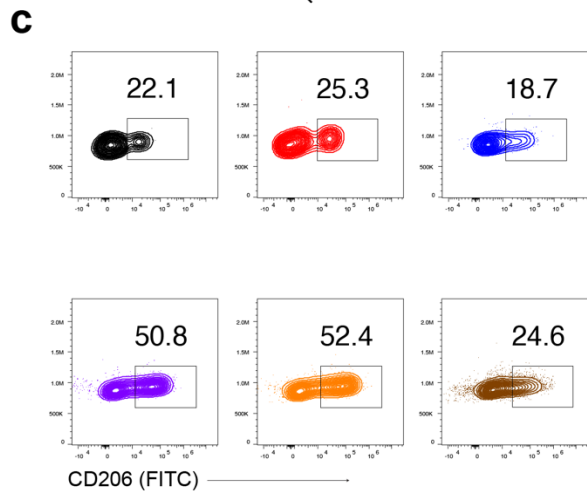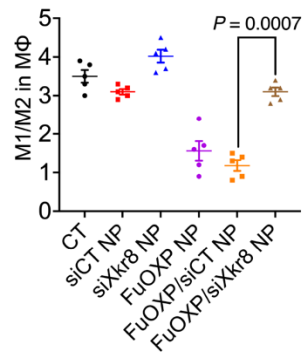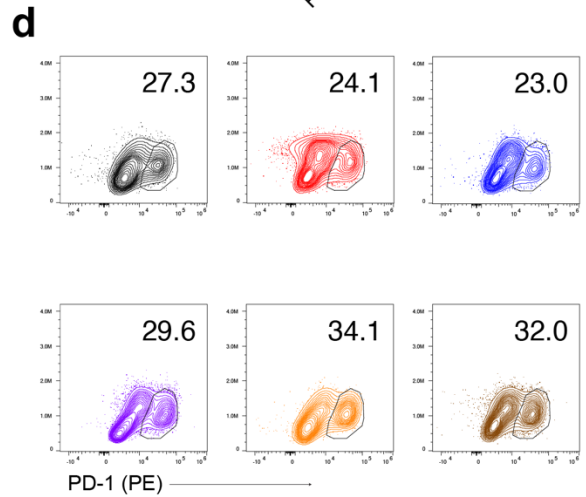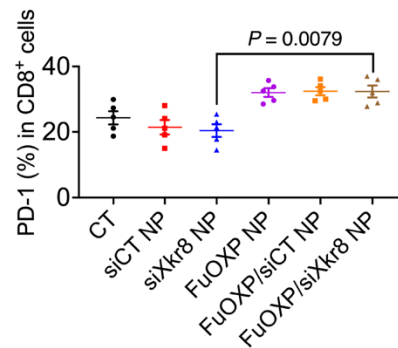

341 **Suppl Fig. 22. Changes in tumor immune microenvironment following treatment**  
342 **with FuOXP/siXkr8-coloaded NPs.** Mice bearing Panc02 tumors received various  
343 treatments once every 5 days for 3 times at a siRNA dose of 1 mg/kg and FuOXP dose  
344 of 5 mg/kg as described in **Fig. 6e**. Single cell suspensions were prepared at the  
345 completion of therapy study and subjected to various flow analyses including Annexin V<sup>+</sup>  
346 cells (**a**), CD45<sup>+</sup> cells (**b**), M1/M2-like ratios (**c**) and PD1<sup>+</sup> CD8<sup>+</sup> cells (**d**), respectively.  
347 Data are presented as mean  $\pm$  SEM (N= 5 mice per group) and representative of 2  
348 independent experiments. Statistical analysis was performed by one-way analysis of  
349 variance (ANOVA) with Tukey post hoc test for comparison.

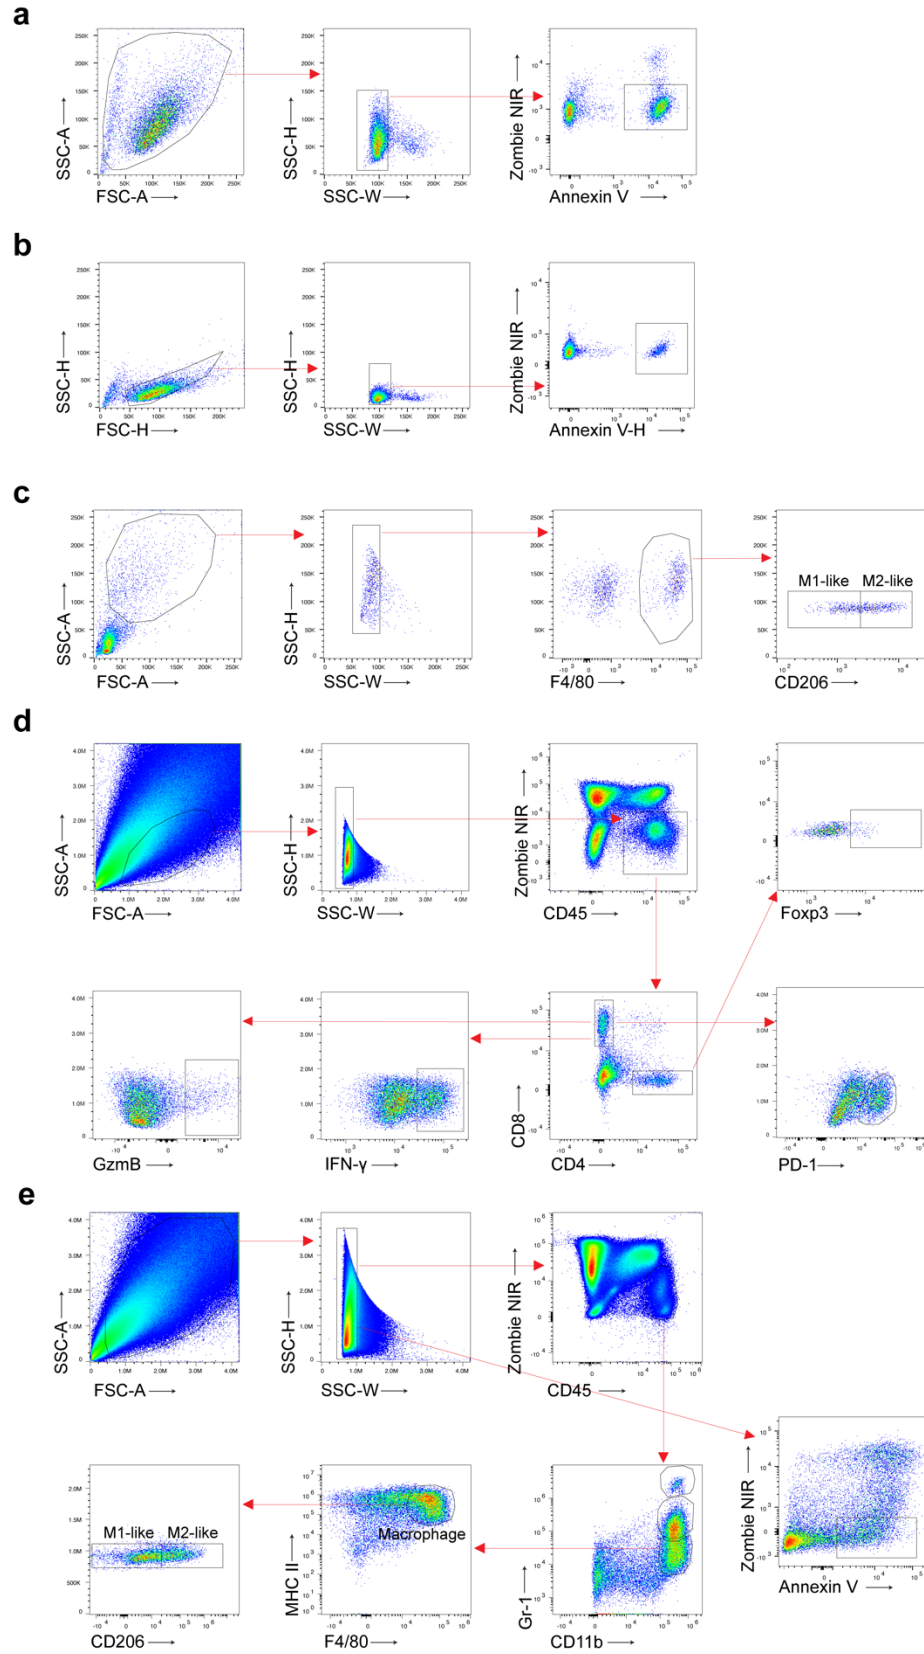

351 **Suppl Fig. 23. Gating strategies for different cell populations.** Gating strategies for *in*  
352 *vitro* Annexin V<sup>+</sup> CT26 tumor cells (**a**), Annexin V<sup>+</sup> EVs (**b**), M1 and M2-like macrophages  
353 (**c**), *in vivo* CD45<sup>+</sup> cells, CD4<sup>+</sup> T cells, CD8<sup>+</sup> T cells, Treg cells, IFN- $\gamma$ <sup>+</sup>, GzmB<sup>+</sup> and PD-1<sup>+</sup>  
354 CD8<sup>+</sup> cells (**d**), Annexin V<sup>+</sup> CT26 tumor cells, M1 and M2-like macrophages (**e**) with  
355 Zombie NIR gating dead cells.

356

357

358

359

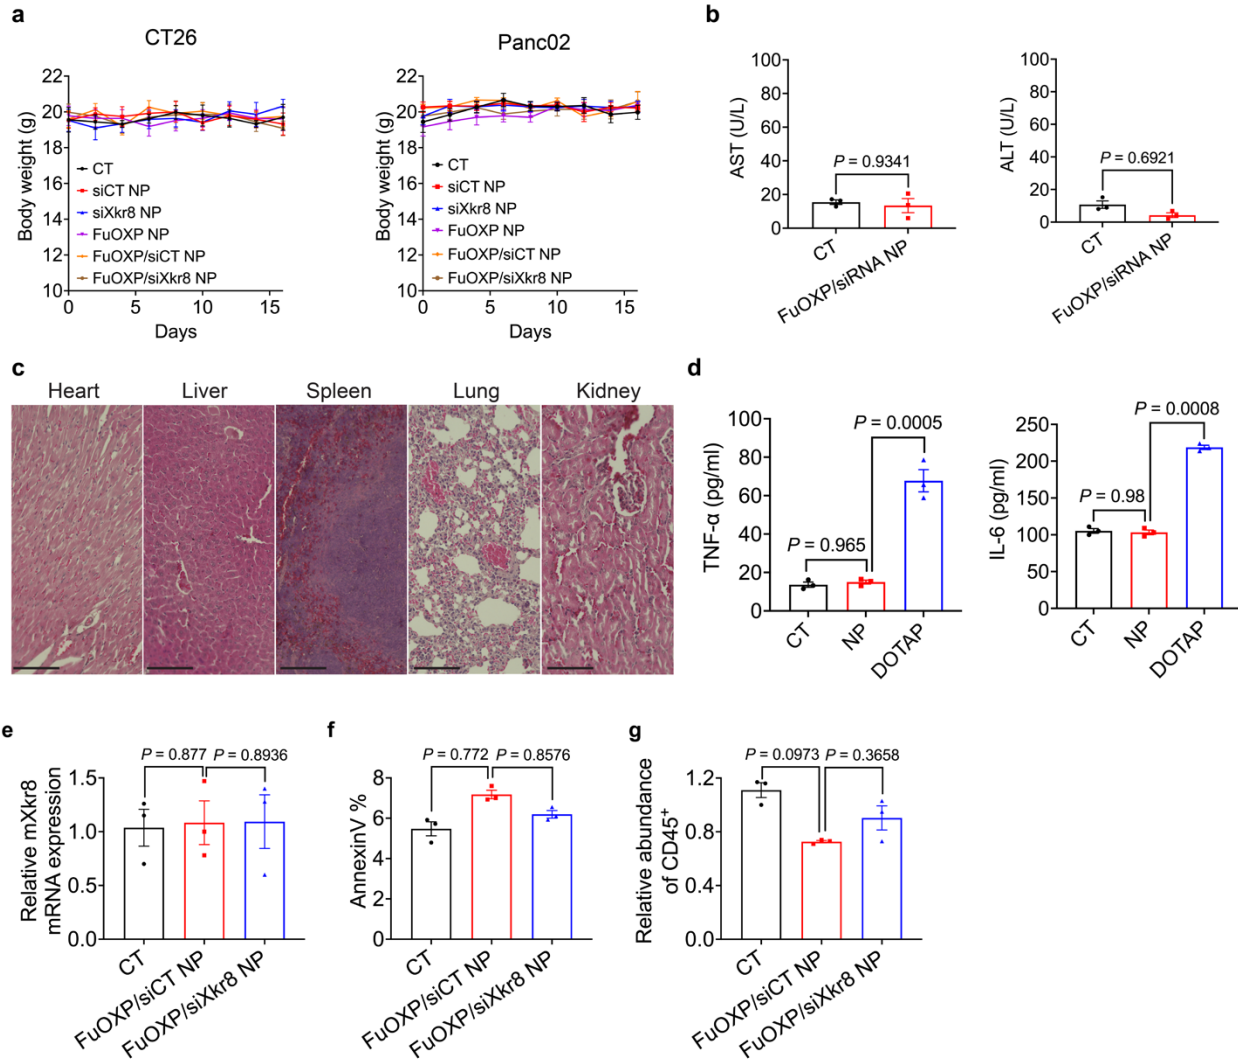

360

361

362

363

364

365

366

367

368

369

**Suppl Fig. 24. Safety profiles of FuOXp/siXkr8-co-loaded NPs.** **a:** CT26 tumor-bearing mice received the treatments as described in **Fig. 6d**. Mouse weights were measured once every 2 days. Data are presented as mean  $\pm$  SEM (N= 5 mice per group) and representative of 2 independent experiments. **b:** Serum levels of AST and ALT at the completion of the therapy study. Data are presented as mean  $\pm$  SEM (N= 3 mice per group) and representative of 2 independent experiments. **c:** Histology of major organs in mice receiving different treatments as described in **Fig. 6d**. Scale bar, 50  $\mu$ m. Shown are representative images from 2 independent experiments. **d:** Serum levels of TNF- $\alpha$  and IL-6 at 2 h following i.v. administration of siRNA PMBOP-CP NPs or siRNA complexed



370 with DOTAP liposomes (N/P, 10/1) at a siRNA dose of 1 mg/kg. Data are presented as  
371 mean  $\pm$  SEM (N= 3 mice per group) and representative of 2 independent experiments. **e**  
372 **& f:** FuOXP NPs caused minimal changes in Xkr8 mRNA levels (**e**) and PS<sup>+</sup> cells (**f**) in  
373 liver. **g:** Minimal changes in CD45<sup>+</sup> cells in liver by FuOXP/siXkr8 NPs. Data (**e ~ g**) are  
374 presented as mean  $\pm$  SEM (N= 3 mice per group) and representative of 2 independent  
375 experiments. Statistical analysis was performed by two-tailed Student's *t*-test for  
376 comparison in **b** and one-way analysis of variance (ANOVA) with Tukey post hoc test for  
377 comparison in **d, e, f** and **g**.

378

379

380

381

382

383

384

385

386

387

388

389

390

| <b>Inhibitor</b> | <b>Concentration</b>        |
|------------------|-----------------------------|
| Chlorpromazine   | 25 $\mu$ M (9 $\mu$ g/mL)   |
| Cytochalasin D   | 10 $\mu$ M (5 $\mu$ g/mL)   |
| Filipin          | 3 $\mu$ M (2 $\mu$ g/mL)    |
| Dynasore         | 80 $\mu$ M (26 $\mu$ g/mL)  |
| Amiloride        | 100 $\mu$ M (29 $\mu$ g/mL) |
| M $\beta$ CD     | 5 mM (7 mg/mL)              |

391

392 **Suppl Table. 2. Various inhibitors of endocytic pathway**

393

394

395

396

397

398

399

400

401

402

403

404

405

406 **Supplementary References**

- 407 1 Dobin, A. *et al.* STAR: ultrafast universal RNA-seq aligner. *Bioinformatics* **29**, 15-  
408 21, doi:10.1093/bioinformatics/bts635 (2013).
- 409 2 Trapnell, C. *et al.* Differential analysis of gene regulation at transcript resolution  
410 with RNA-seq. *Nat Biotechnol* **31**, 46-53, doi:10.1038/nbt.2450 (2013).
- 411 3 Tivol, W. F., Briegel, A. & Jensen, G. J. An improved cryogen for plunge freezing.  
412 *Microsc Microanal* **14**, 375-379, doi:10.1017/S1431927608080781 (2008).
- 413 4 Semple, S. C. *et al.* Rational design of cationic lipids for siRNA delivery. *Nat*  
414 *Biotechnol* **28**, 172-176, doi:10.1038/nbt.1602 (2010).
- 415 5 Belliveau, N. M. *et al.* Microfluidic Synthesis of Highly Potent Limit-size Lipid  
416 Nanoparticles for In Vivo Delivery of siRNA. *Mol Ther-Nucl Acids* **1**, doi:ARTN 37  
417 10.1038/mtna.2012.28 (2012).
- 418 6 Brouckaert, G. *et al.* Phagocytosis of necrotic cells by macrophages is  
419 phosphatidylserine dependent and does not induce inflammatory cytokine  
420 production. *Mol Biol Cell* **15**, 1089-1100, doi:10.1091/mbc.e03-09-0668 (2004).
- 421 7 Ma, Z. *et al.* Cationic lipids enhance siRNA-mediated interferon response in  
422 mice. *Biochemical and Biophysical Research Communications* **330**, 755-759,  
423 doi:10.1016/j.bbrc.2005.03.041 (2005).

424
