# Supplementary material
Source: PubMed Central journal article supplement (PMC9974593)

# Source data for Fig.1

**Fig. 1d**

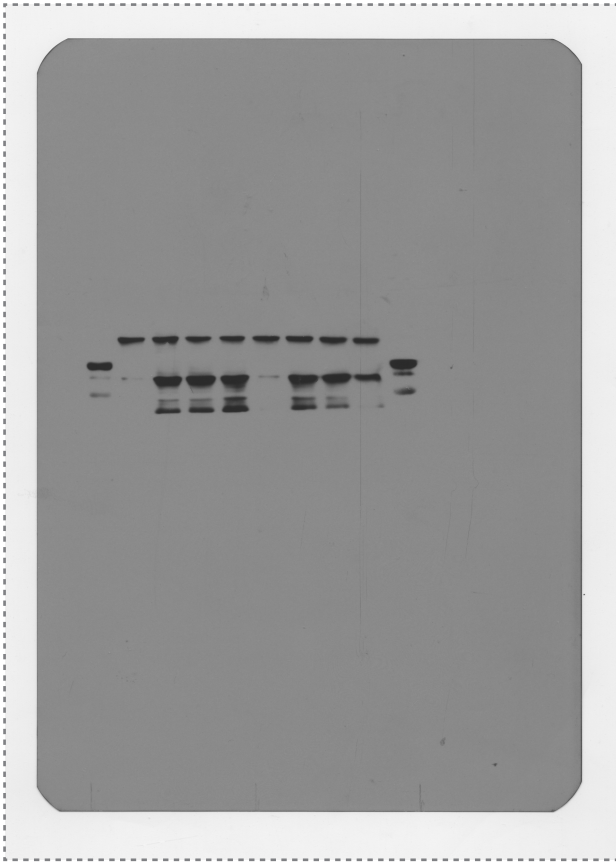

**Fig. 1f**

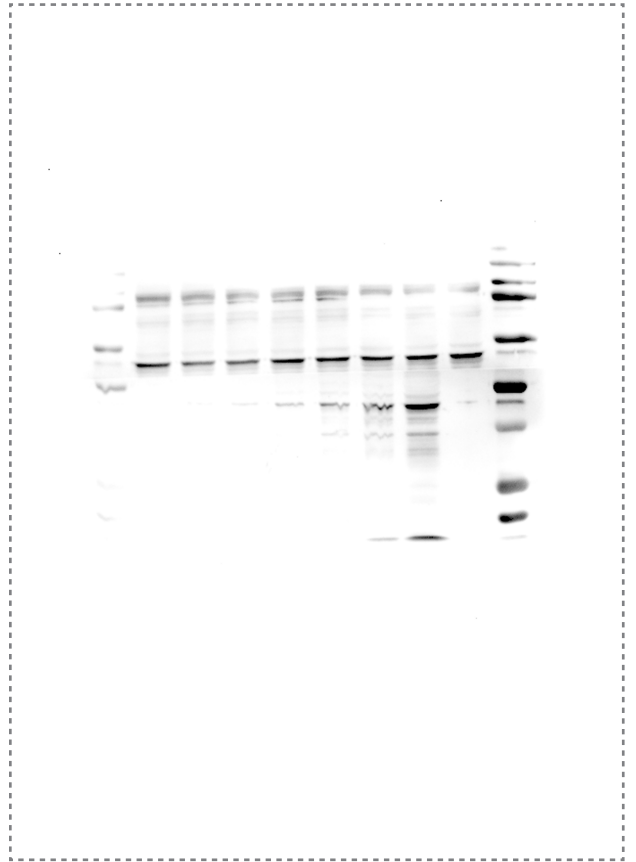

**Fig. 1h**

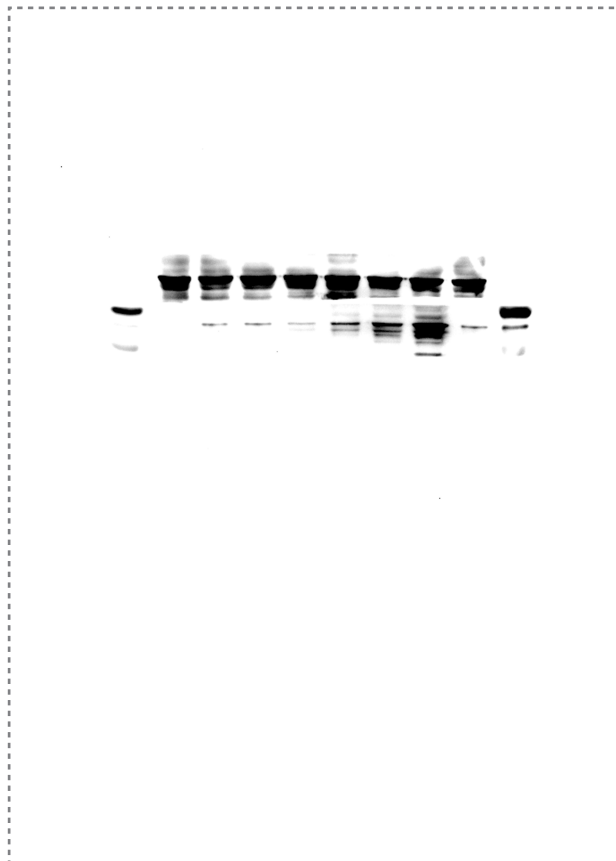

**Fig. 1o**

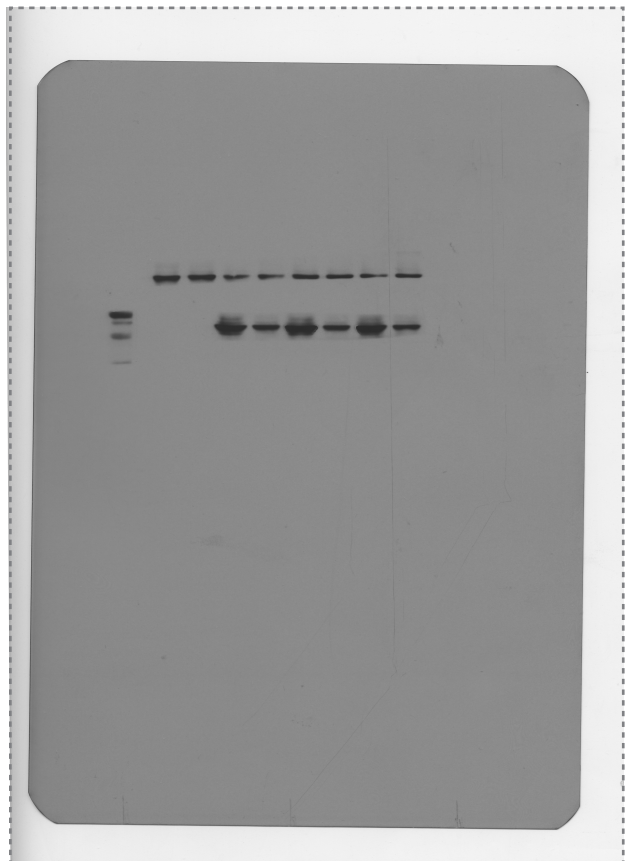

Supplement: NIHMS1848947-supplement-1848947_SD_Fig_1_unprocessed_WB.pdf [file NIHMS1848947-supplement-1848947_SD_Fig_1_unprocessed_WB.pdf]

## Source data for Fig.2

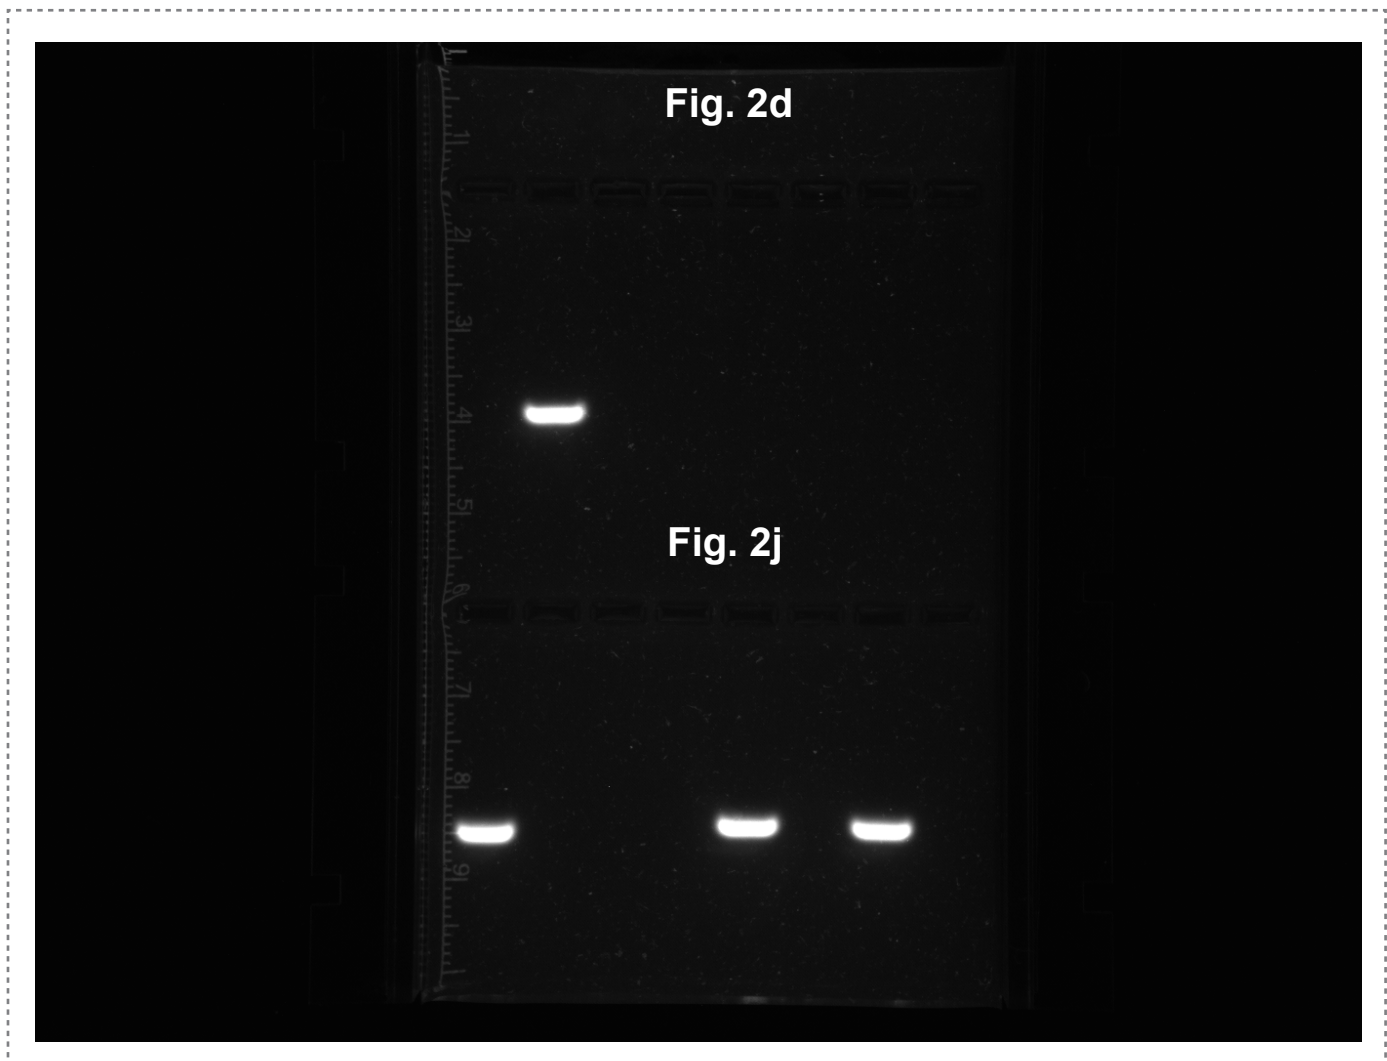

Supplement: NIHMS1848947-supplement-1848947_SD_Fig_2_unprocessed_WB.pdf [file NIHMS1848947-supplement-1848947_SD_Fig_2_unprocessed_WB.pdf]
